# Supplementary material for: Multiple genomic regions influence root morphology and seedling growth in cultivated sunflower (Helianthus annuus L.) under well-watered and water-limited conditions
Source: PubMed Central journal article supplement (PMC6147562; doi:10.1371/journal.pone.0204279), 2018-09-20

# Biomass Allocation Well-Watered

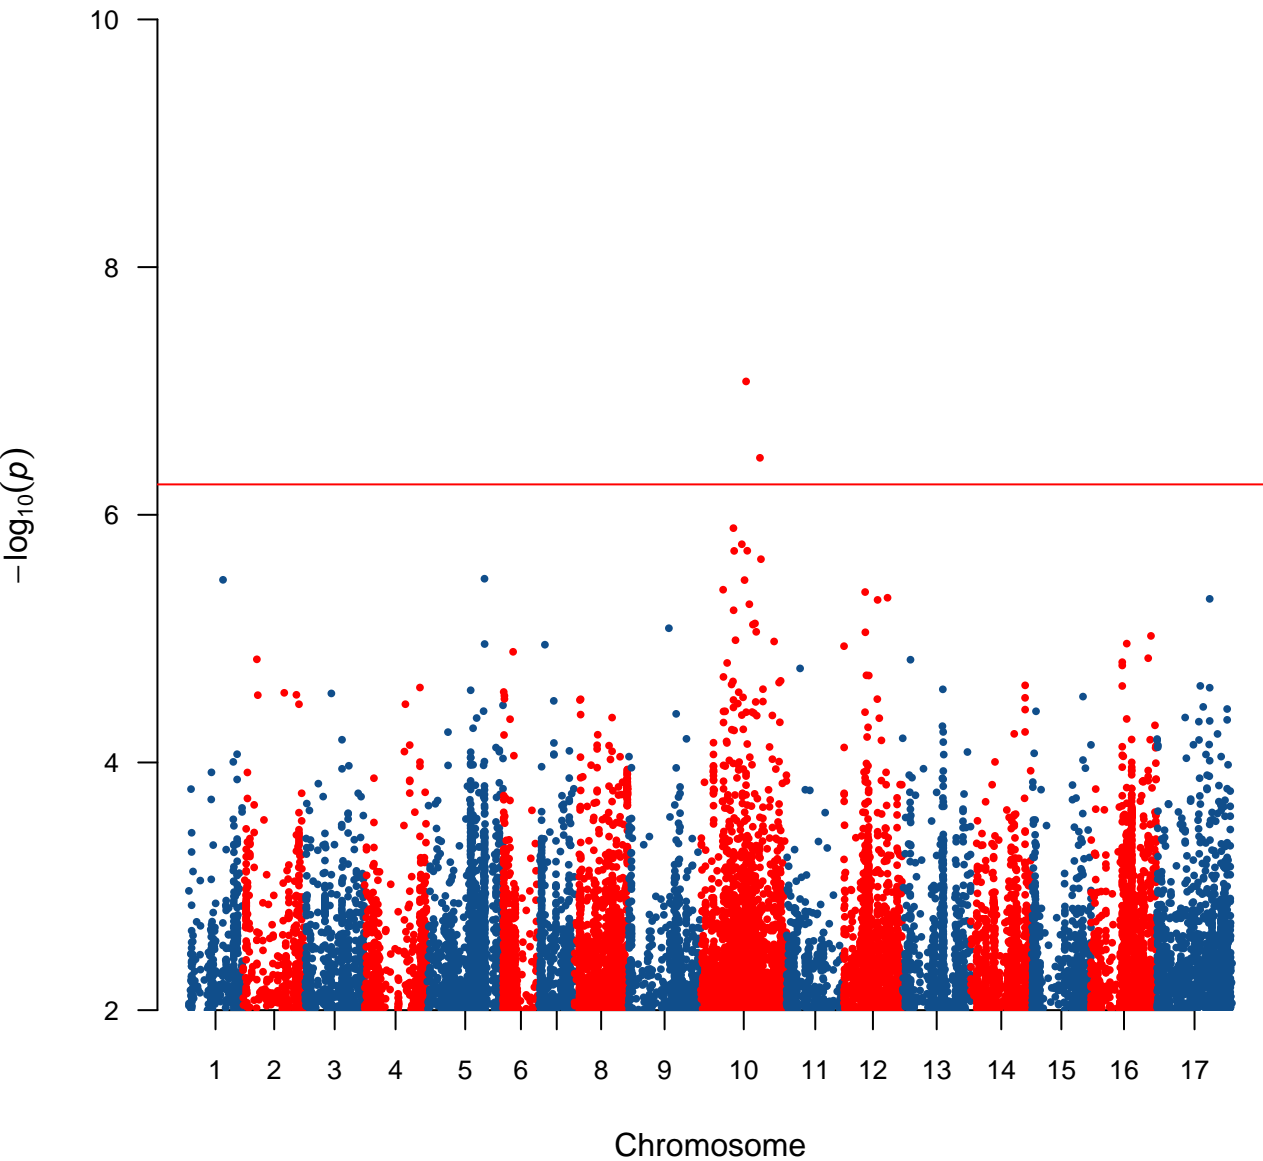

# Biomass Allocation Water-Limited

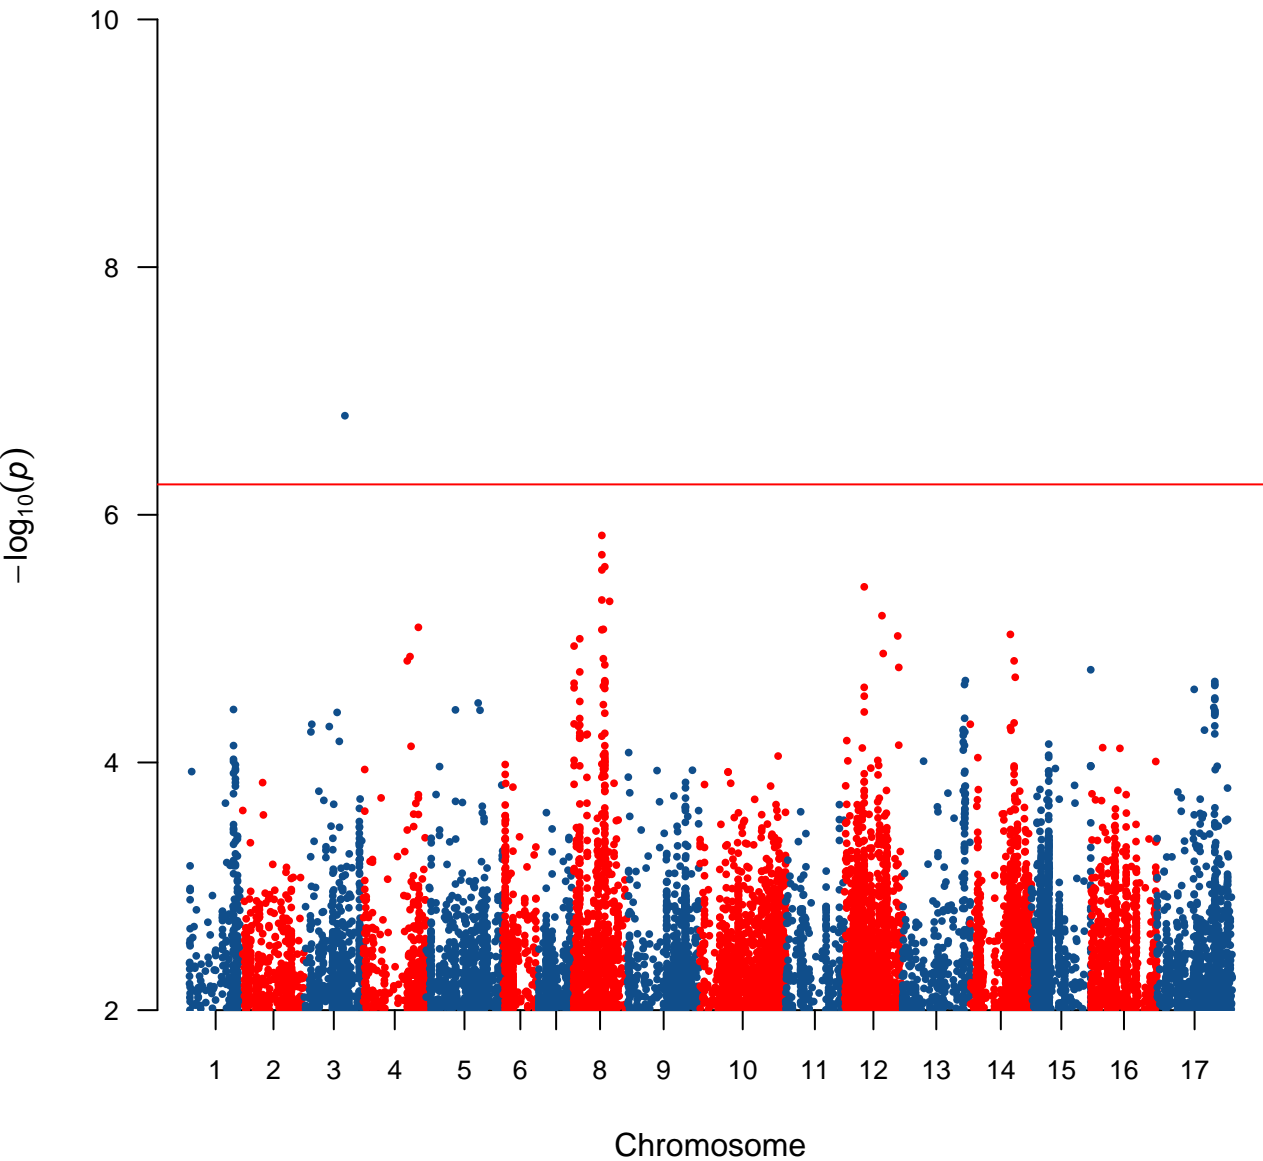

# Root Biomass Well-Watered

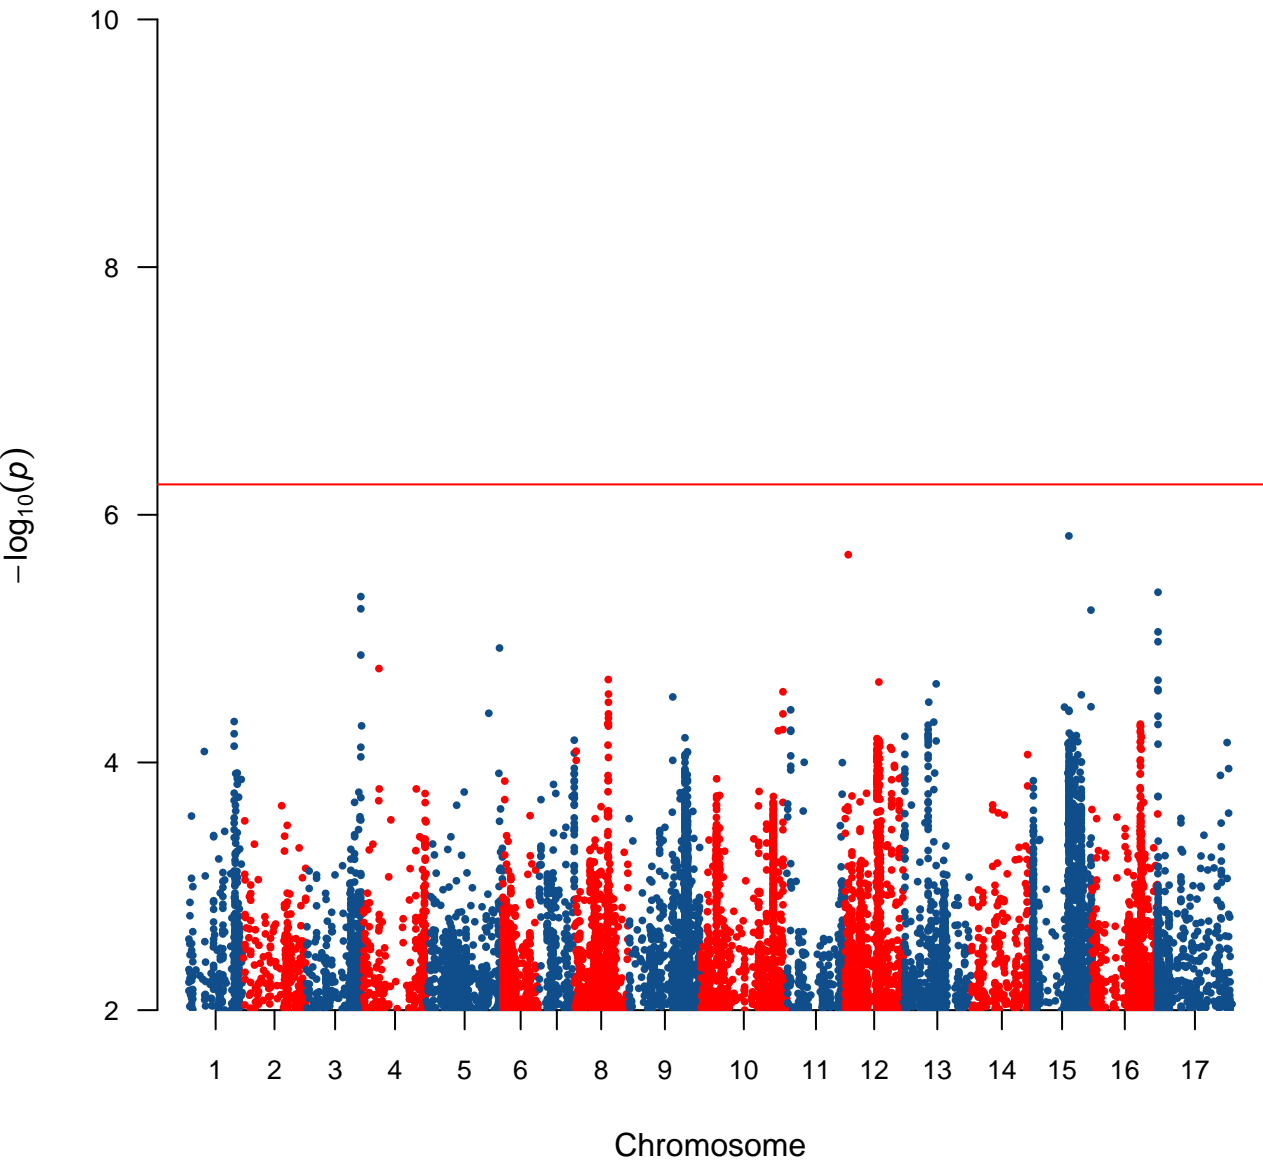

# Root Biomass Water-Limited

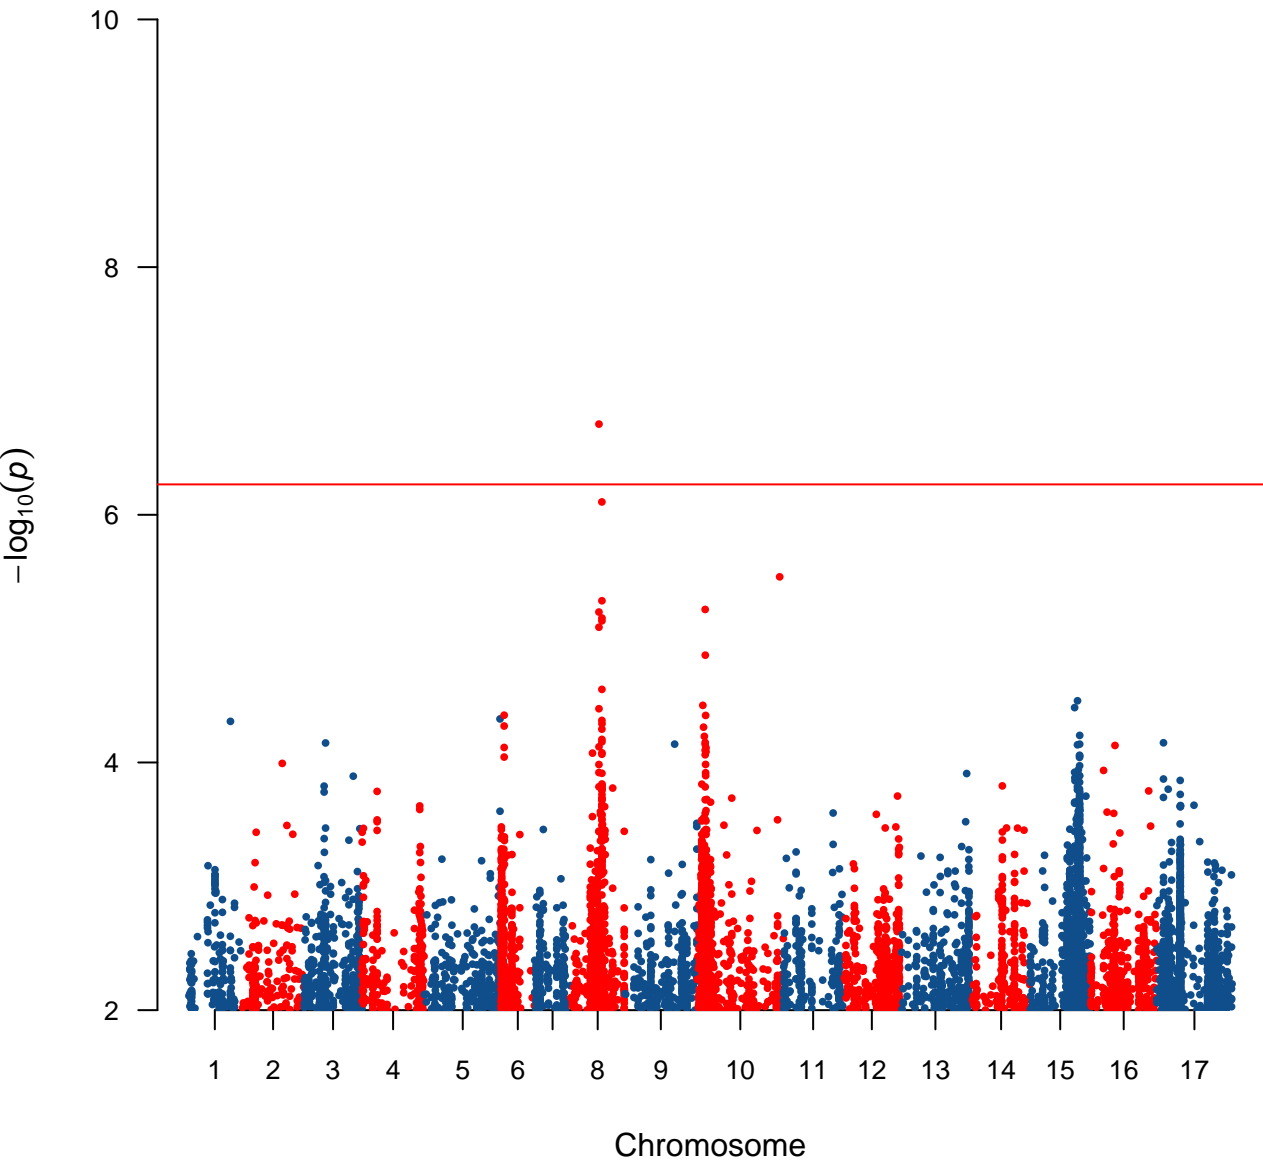

# Taproot Length Well-Watered

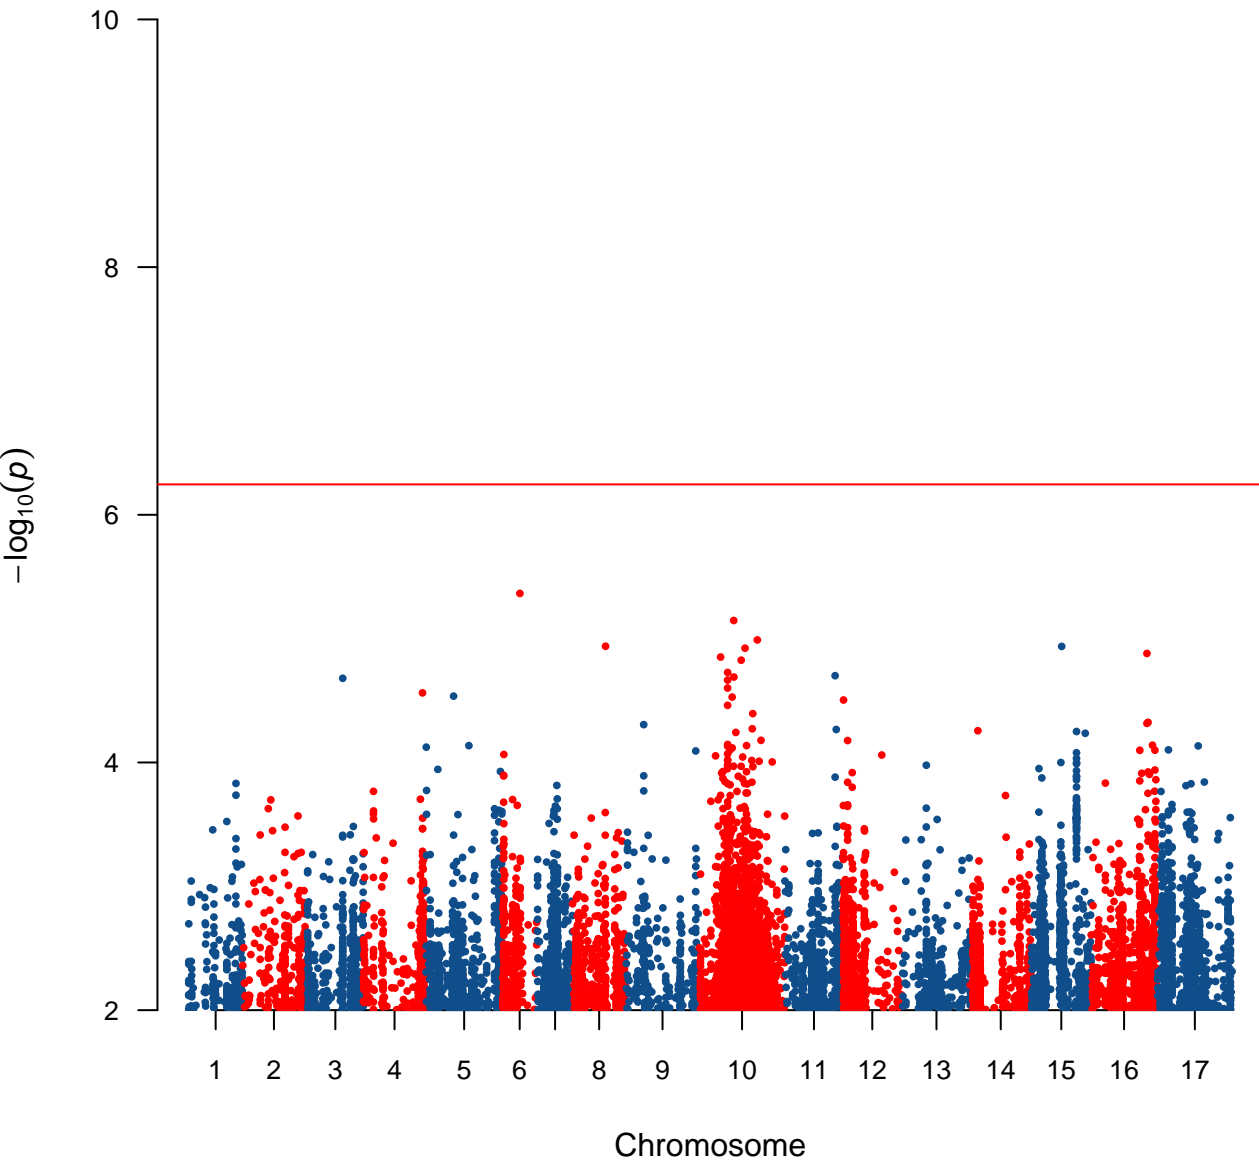

# Taproot Length Water-Limited

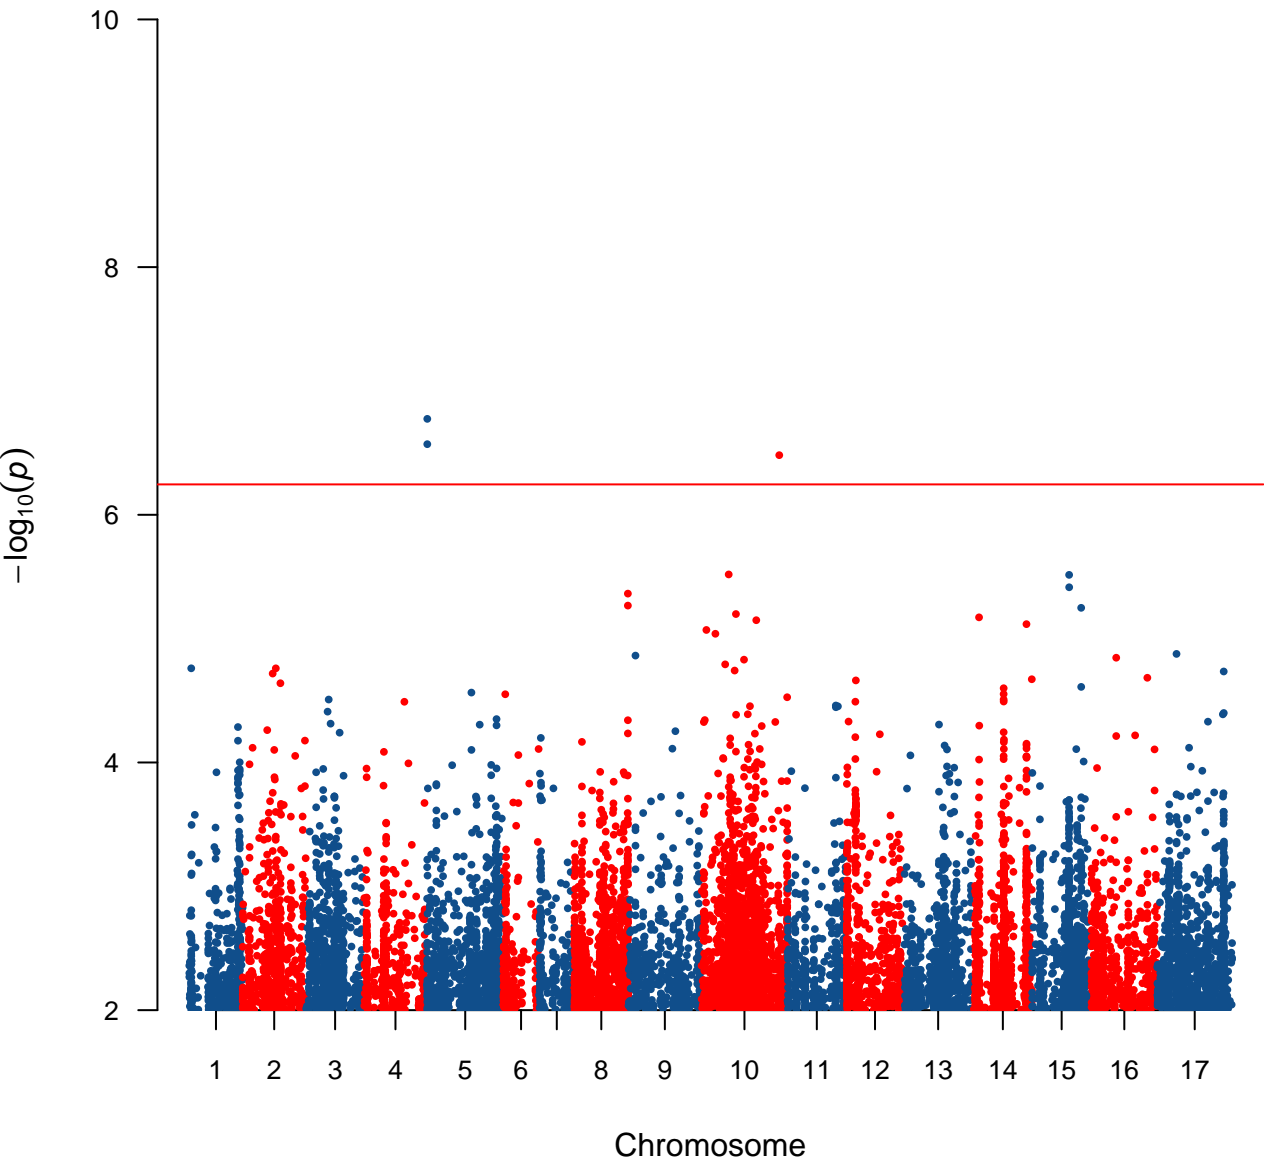

# SRL Well-Watered

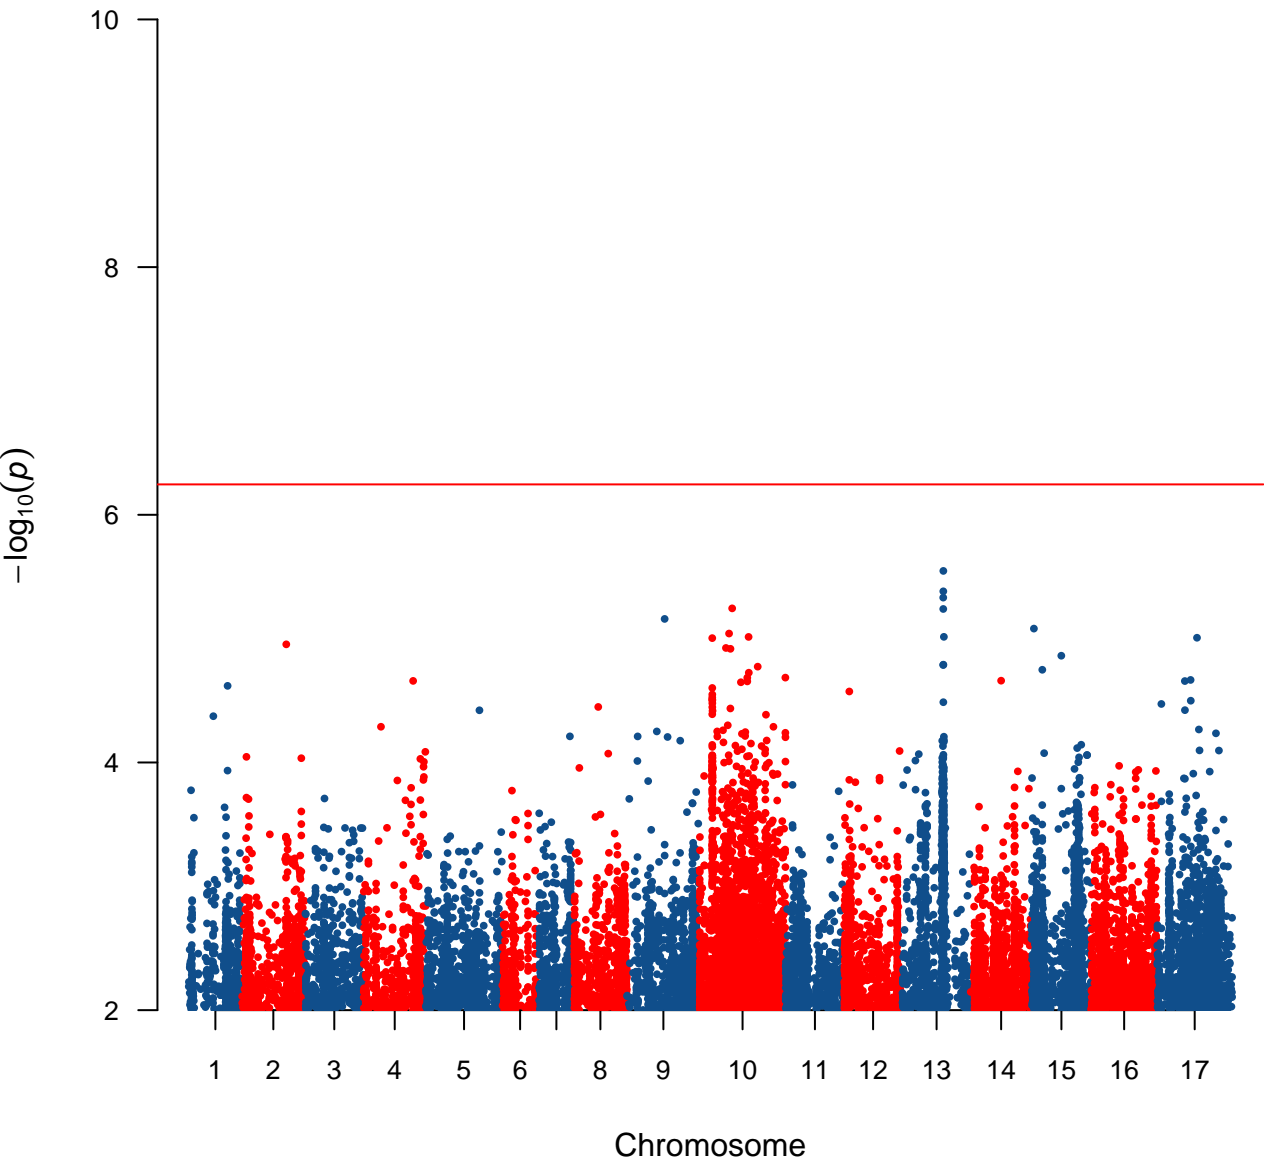

# SRL Water-Limited

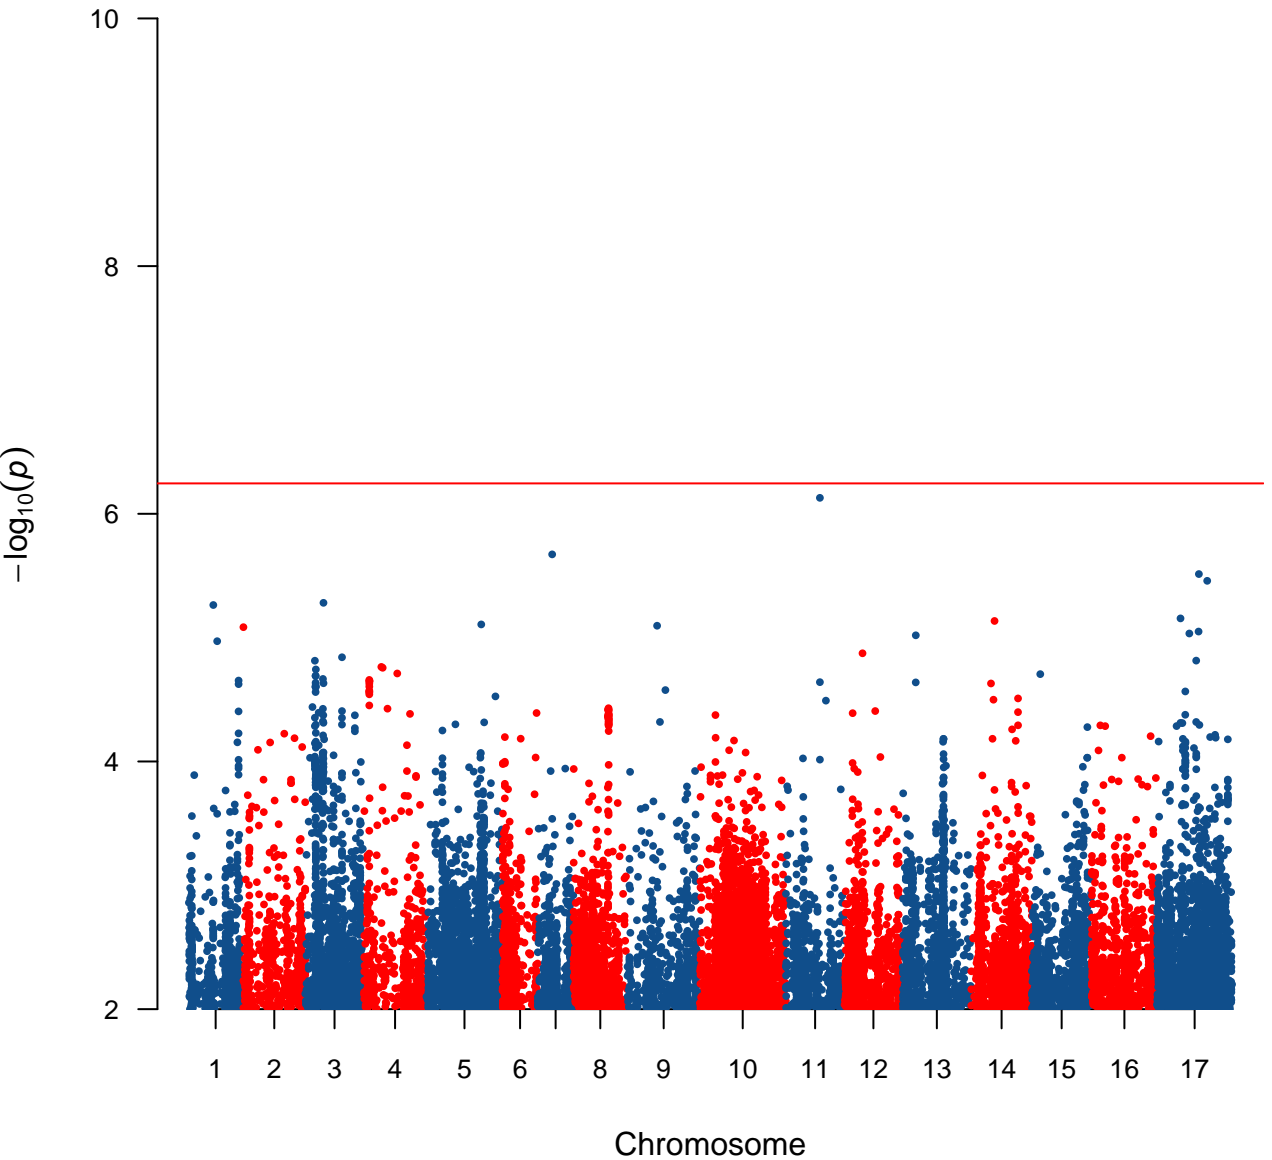



# Stem Diameter Well-Watered

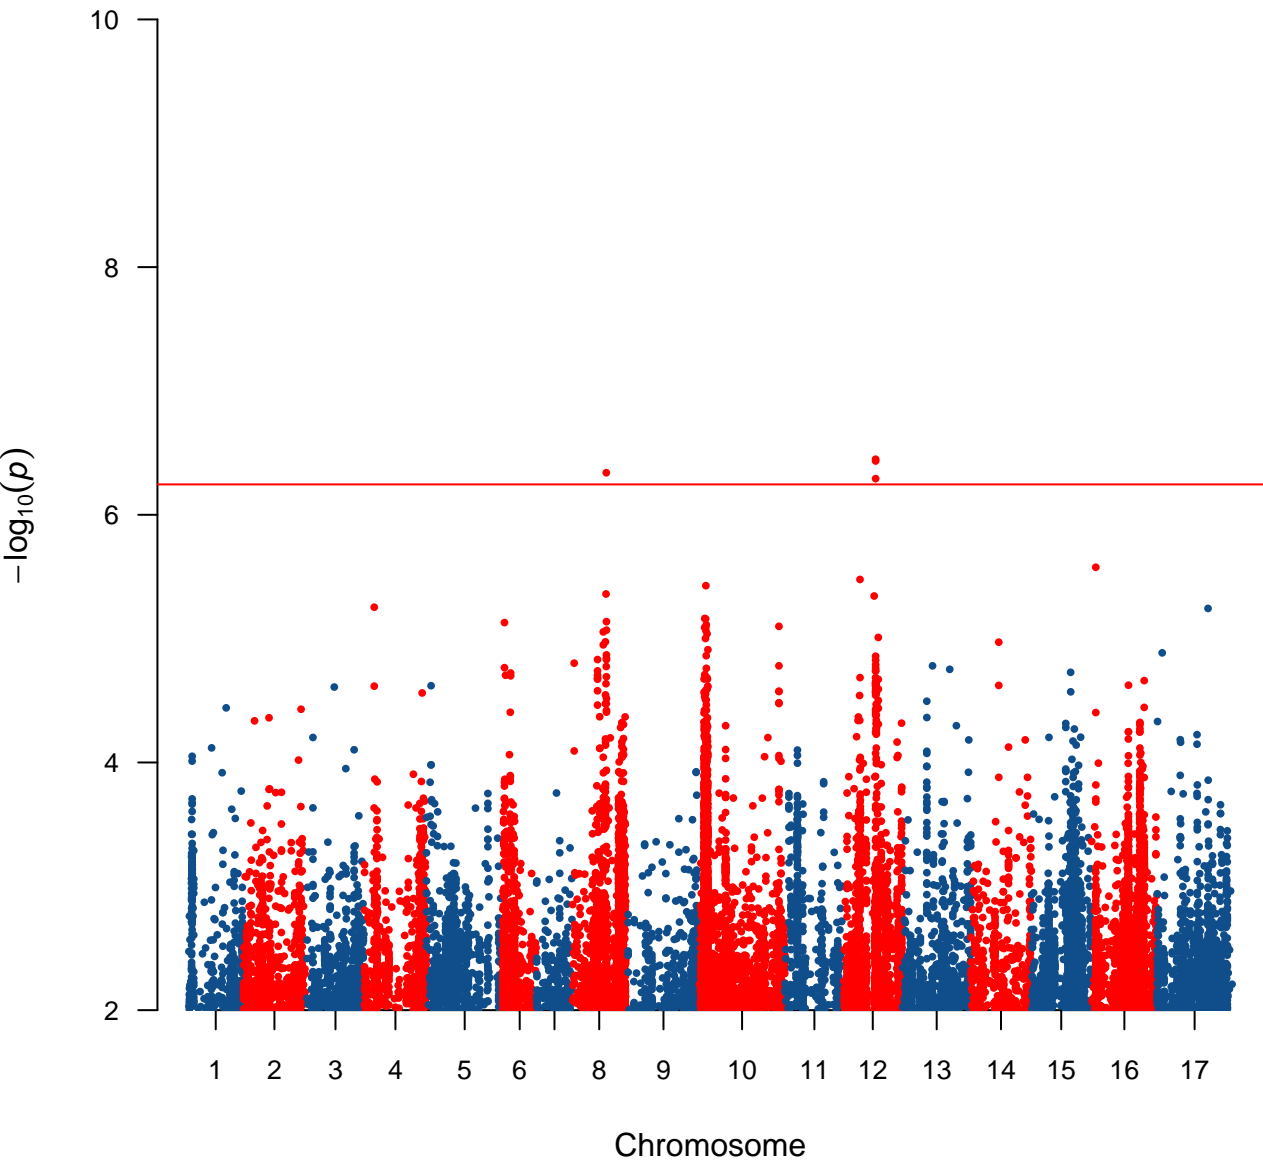

# Stem Diameter Water-Limited

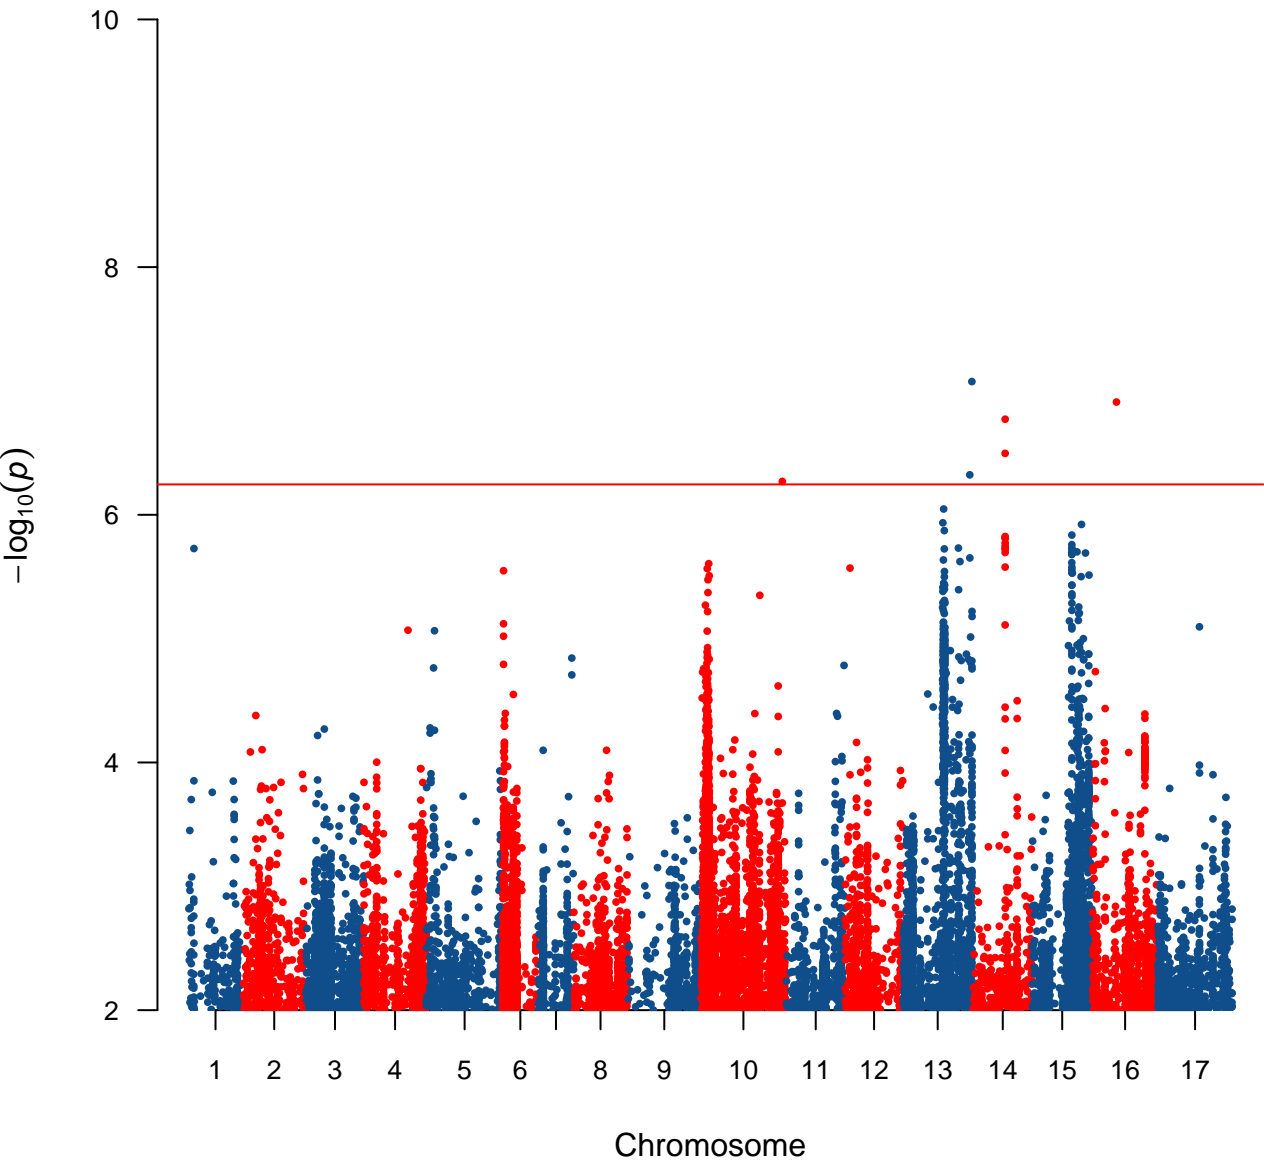

# Stem Height Well-Watered

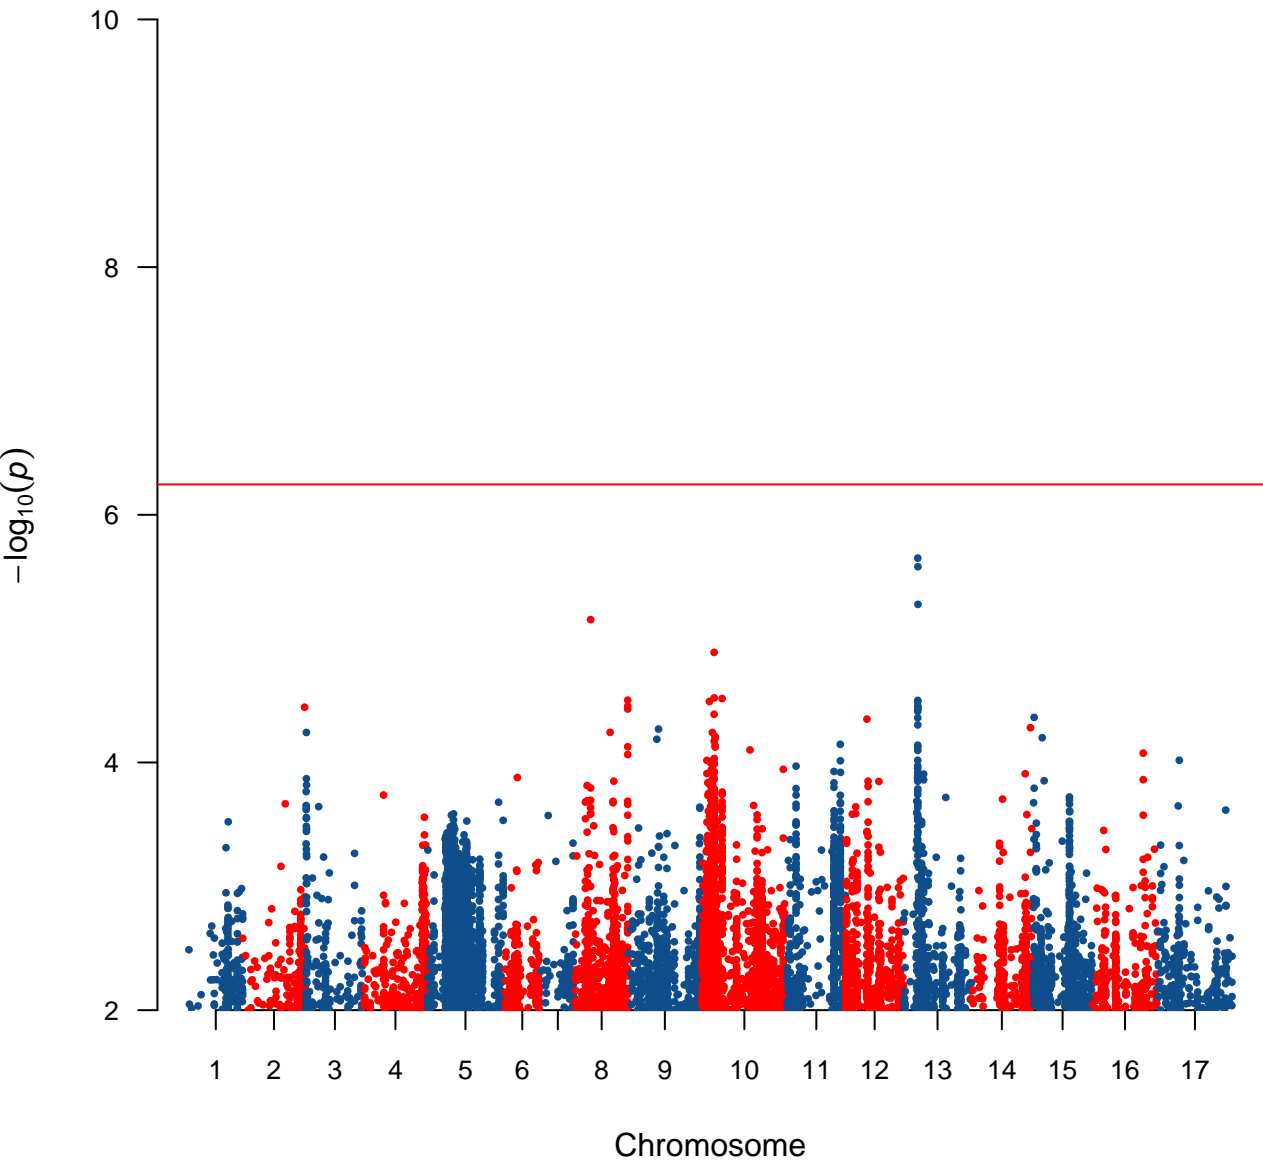

# Stem Height Water-Limited

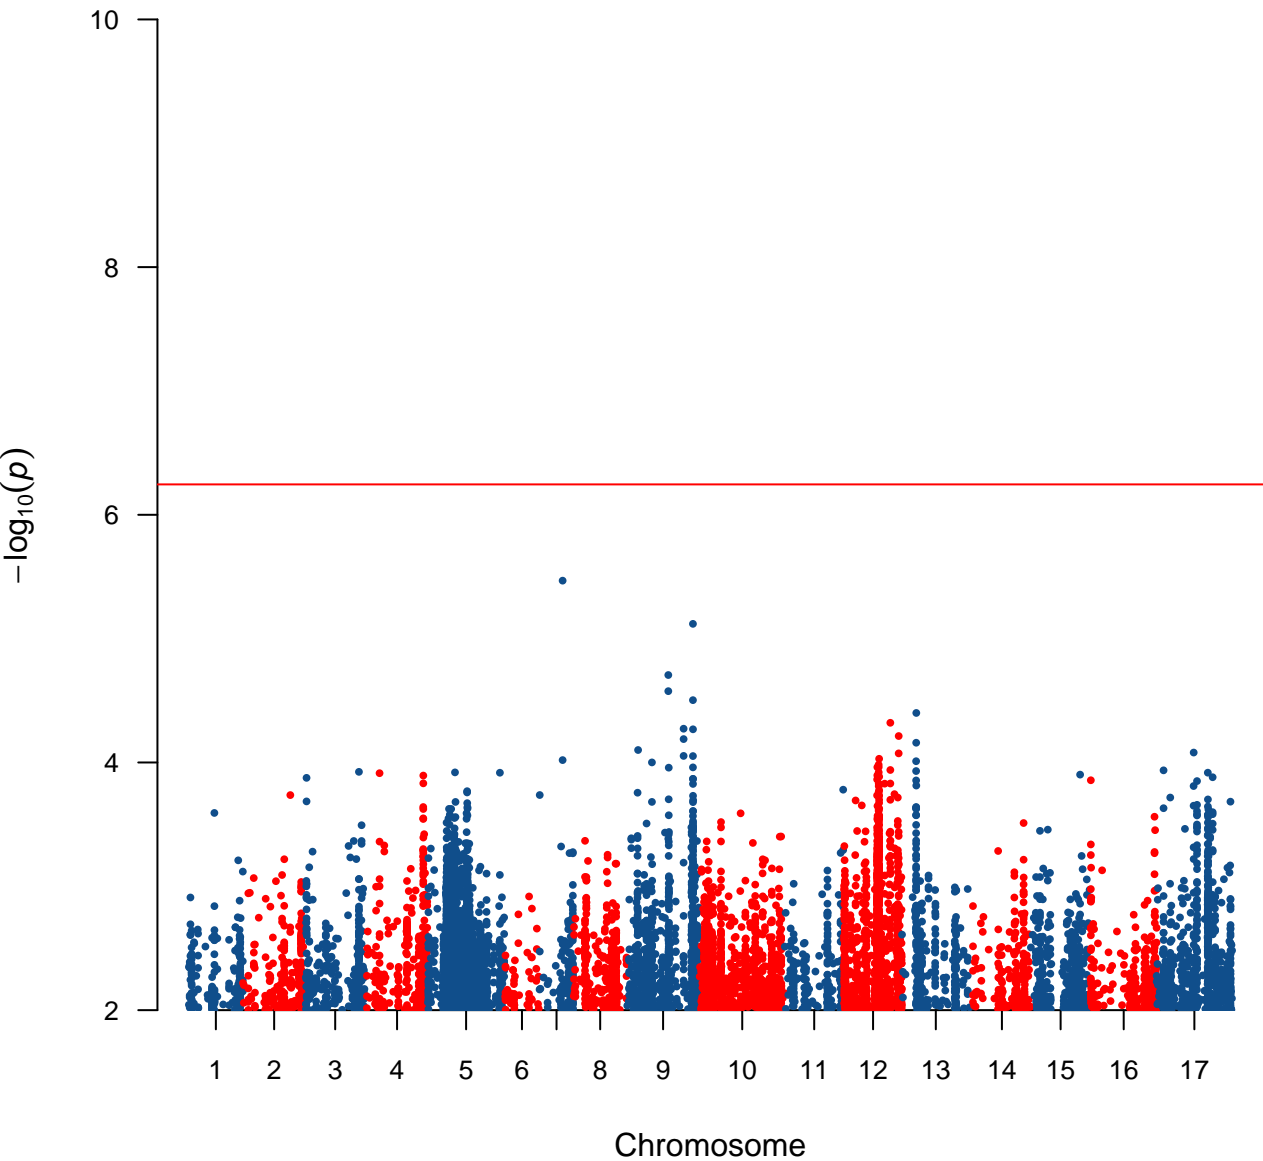

# TRL Allocation Well-Watered

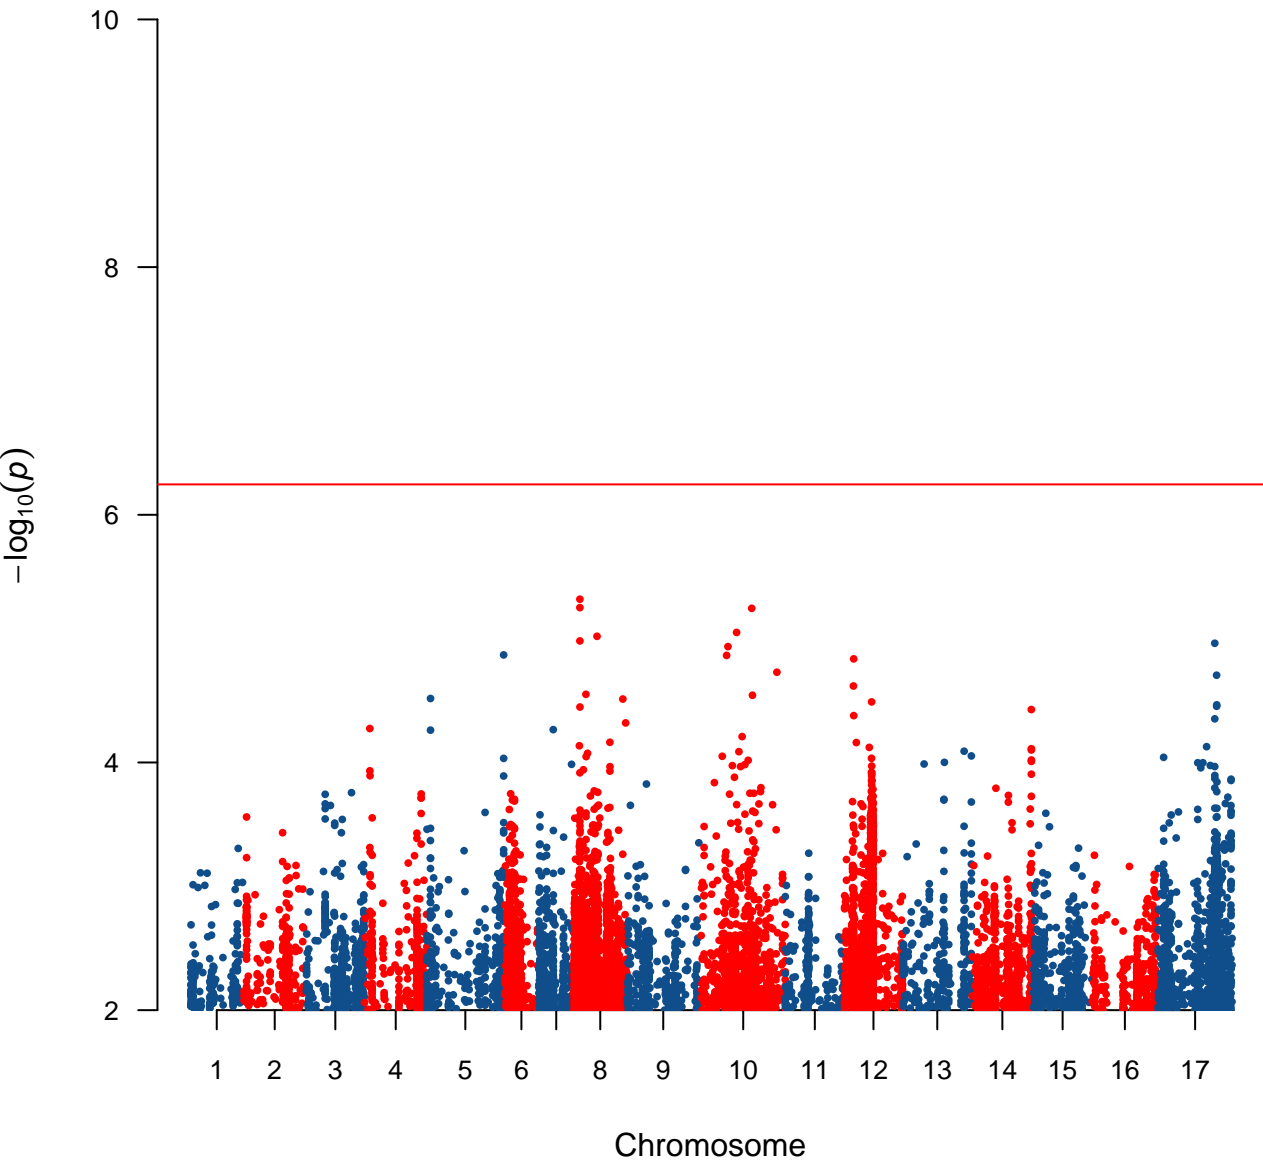

# TRL Allocation Water-Limited

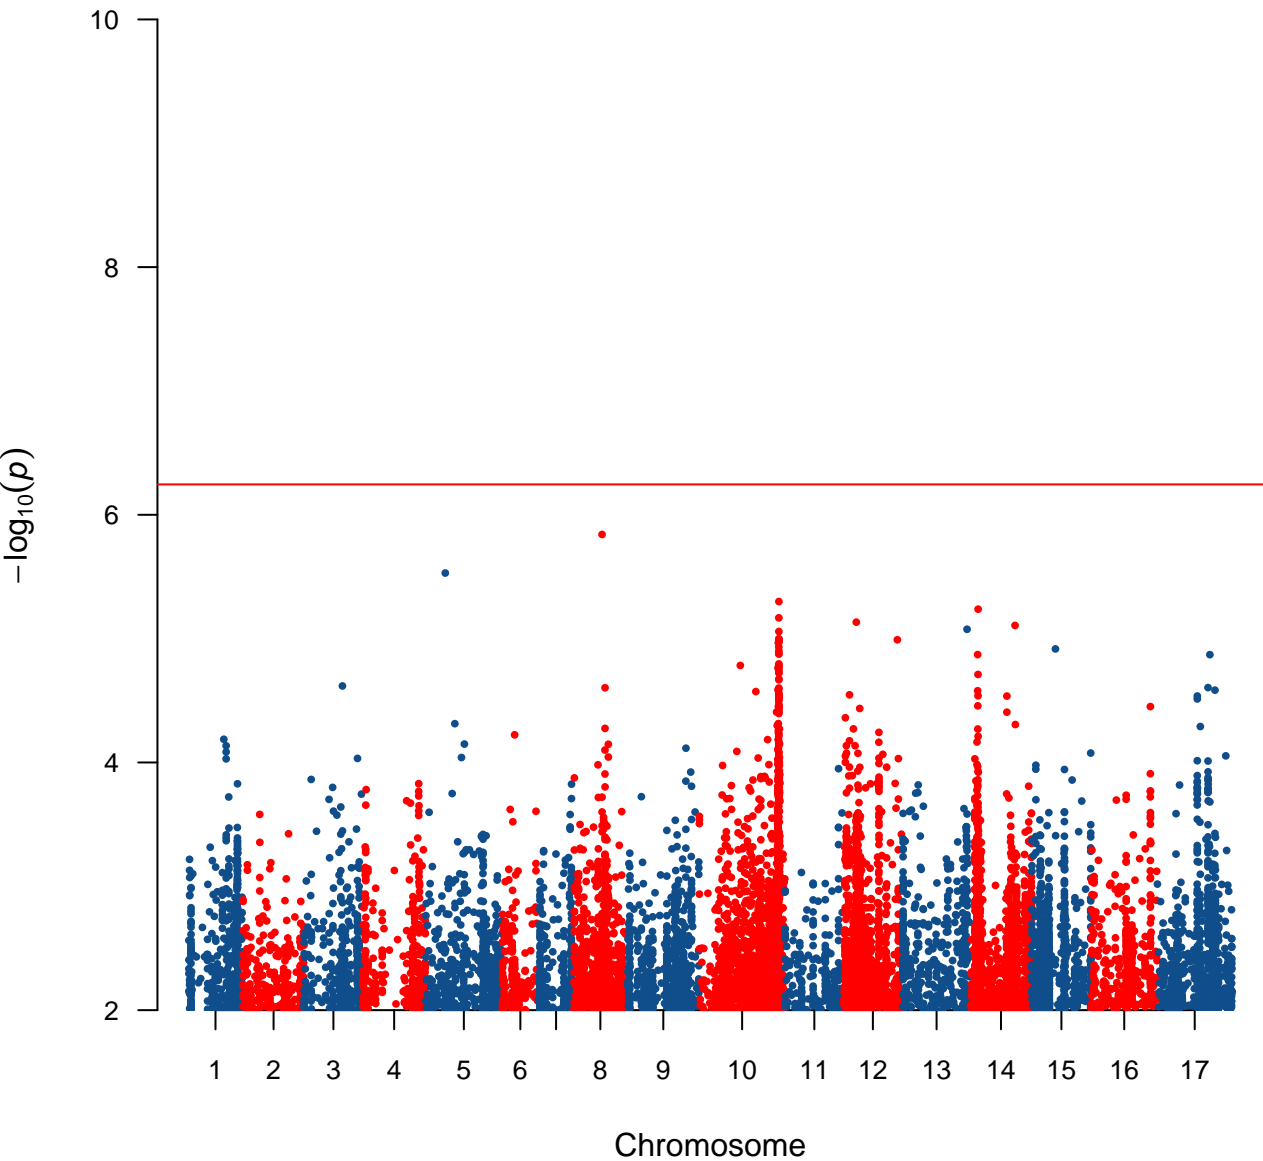

# TRL Well-Watered

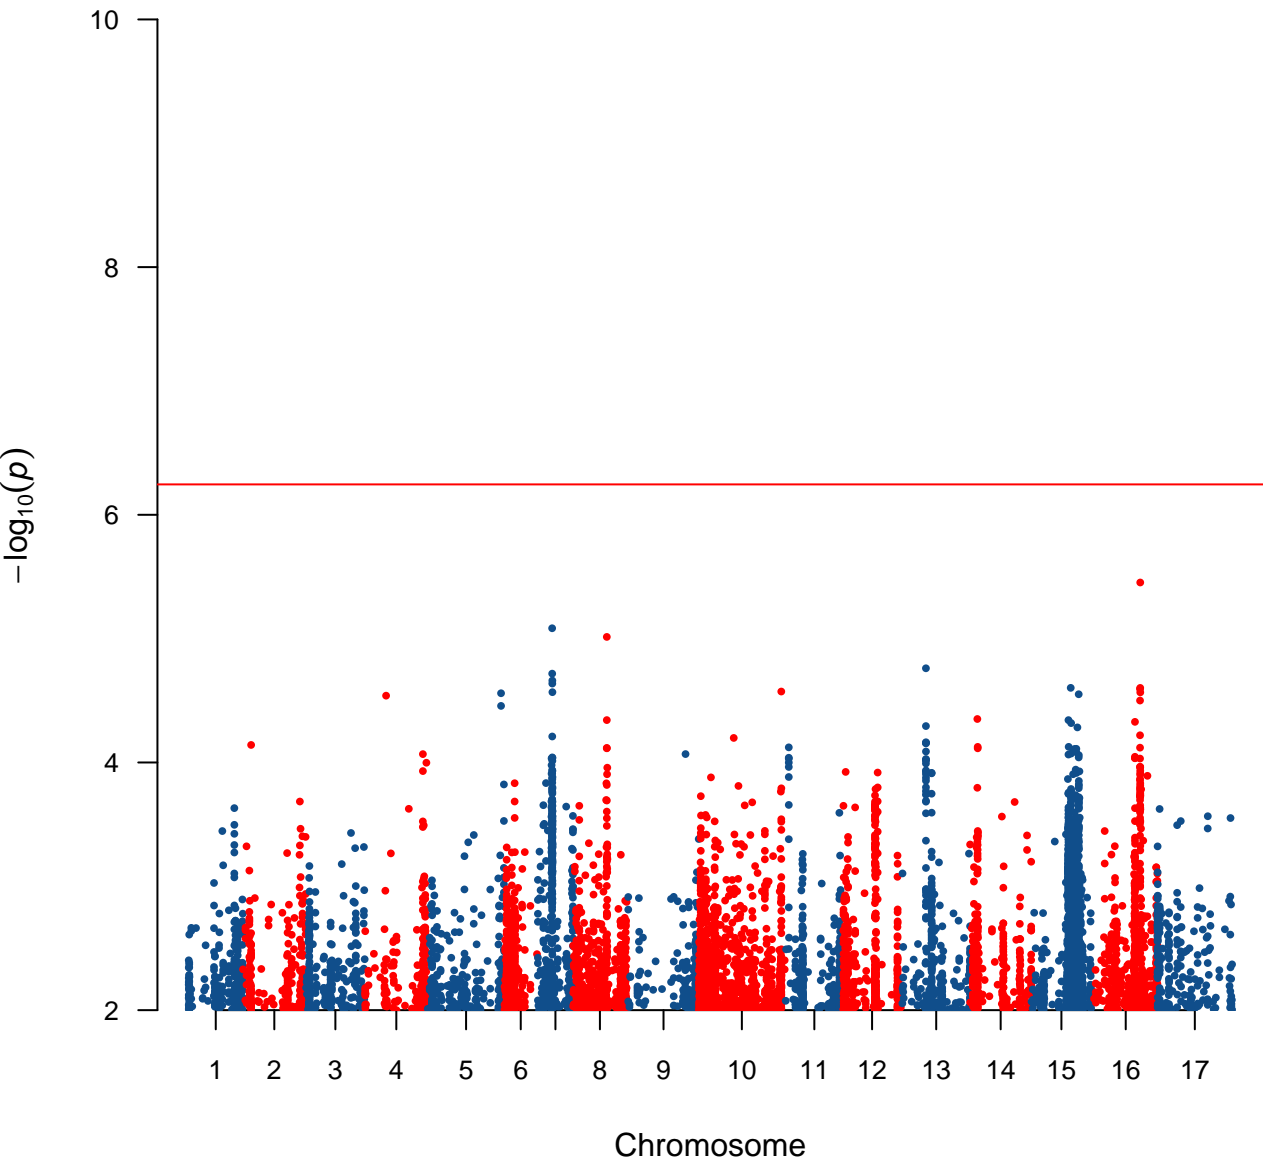

# TRL Water-Limited

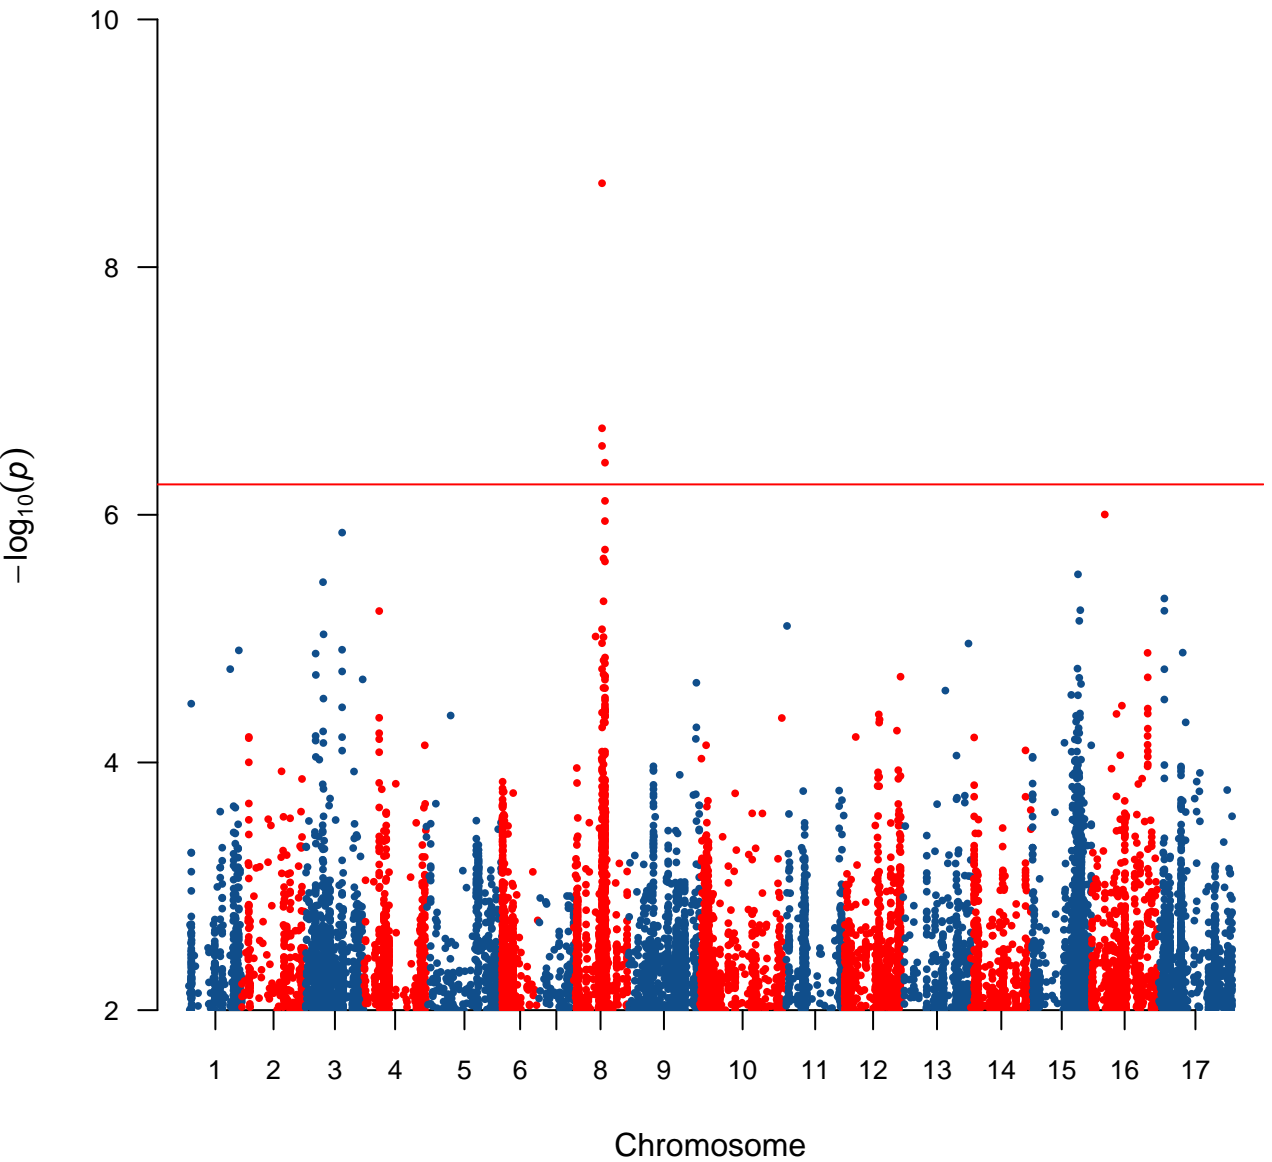

Supplement: pone.0204279.s003.pdf [file pone.0204279.s003.pdf]
