# Supplementary material for: Multiple genomic regions influence root morphology and seedling growth in cultivated sunflower (Helianthus annuus L.) under well-watered and water-limited conditions
Source: PubMed Central journal article supplement (PMC6147562; doi:10.1371/journal.pone.0204279), 2018-09-20

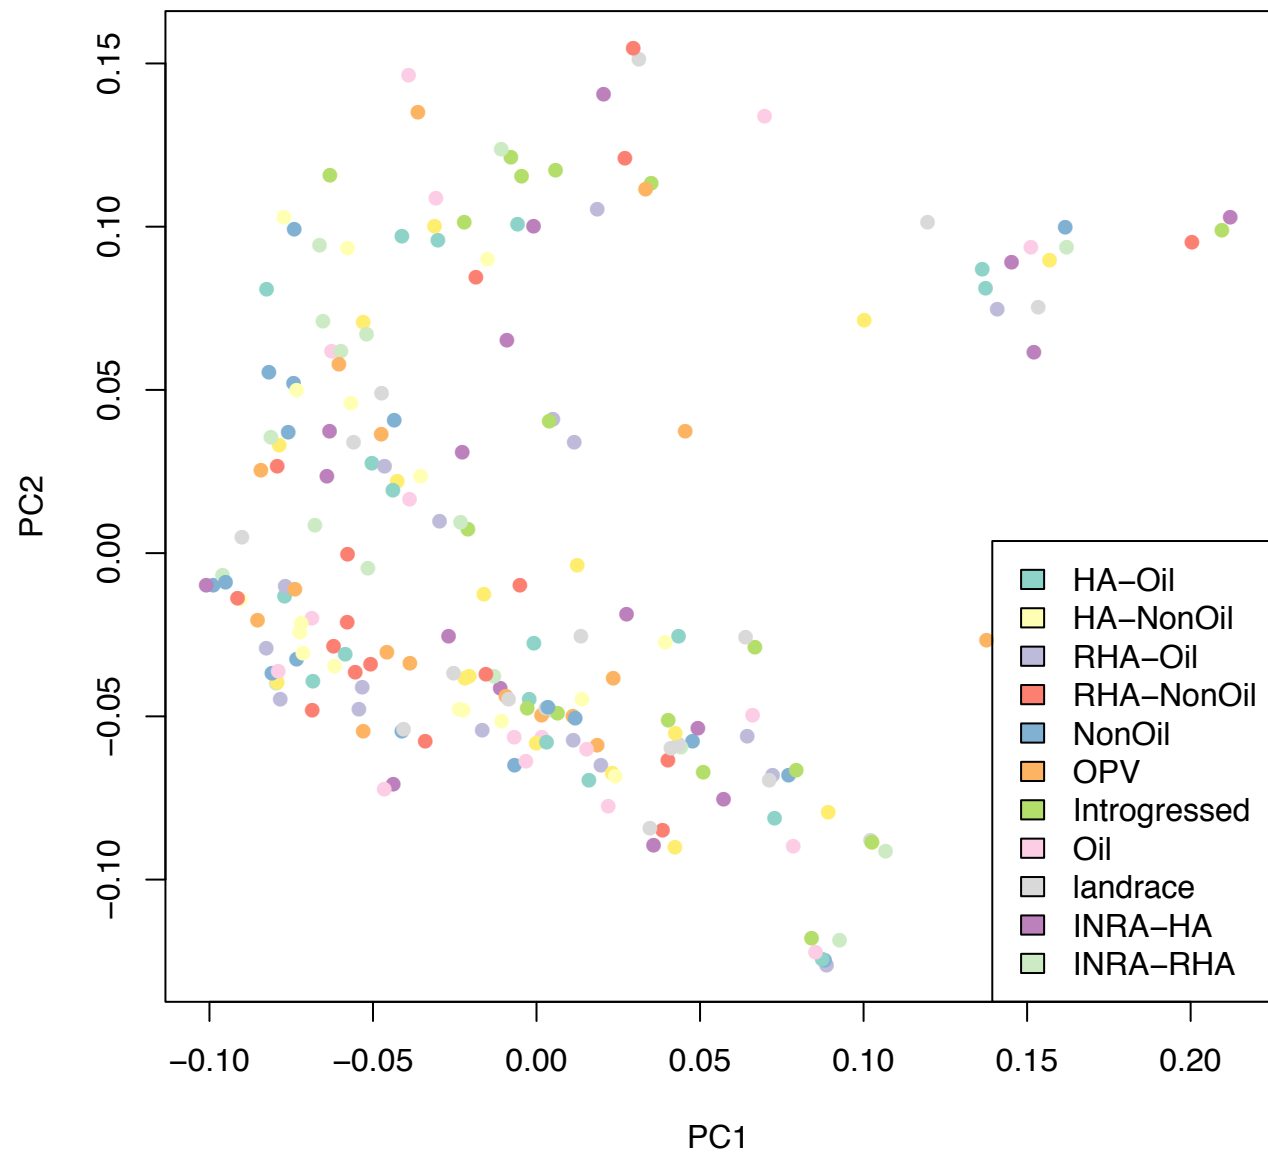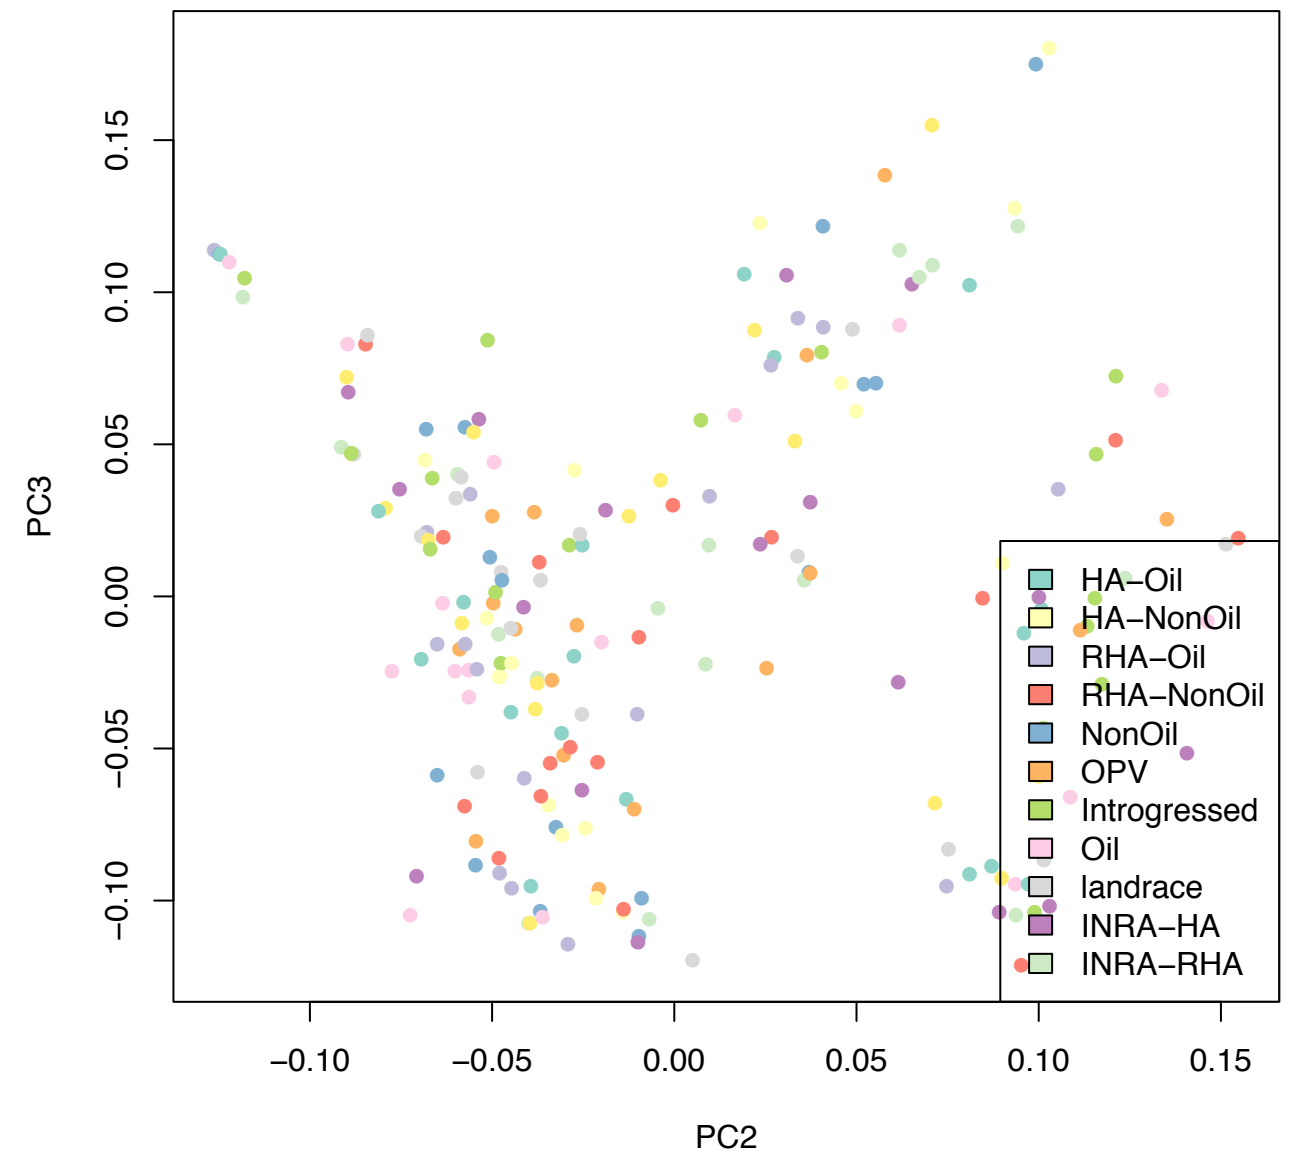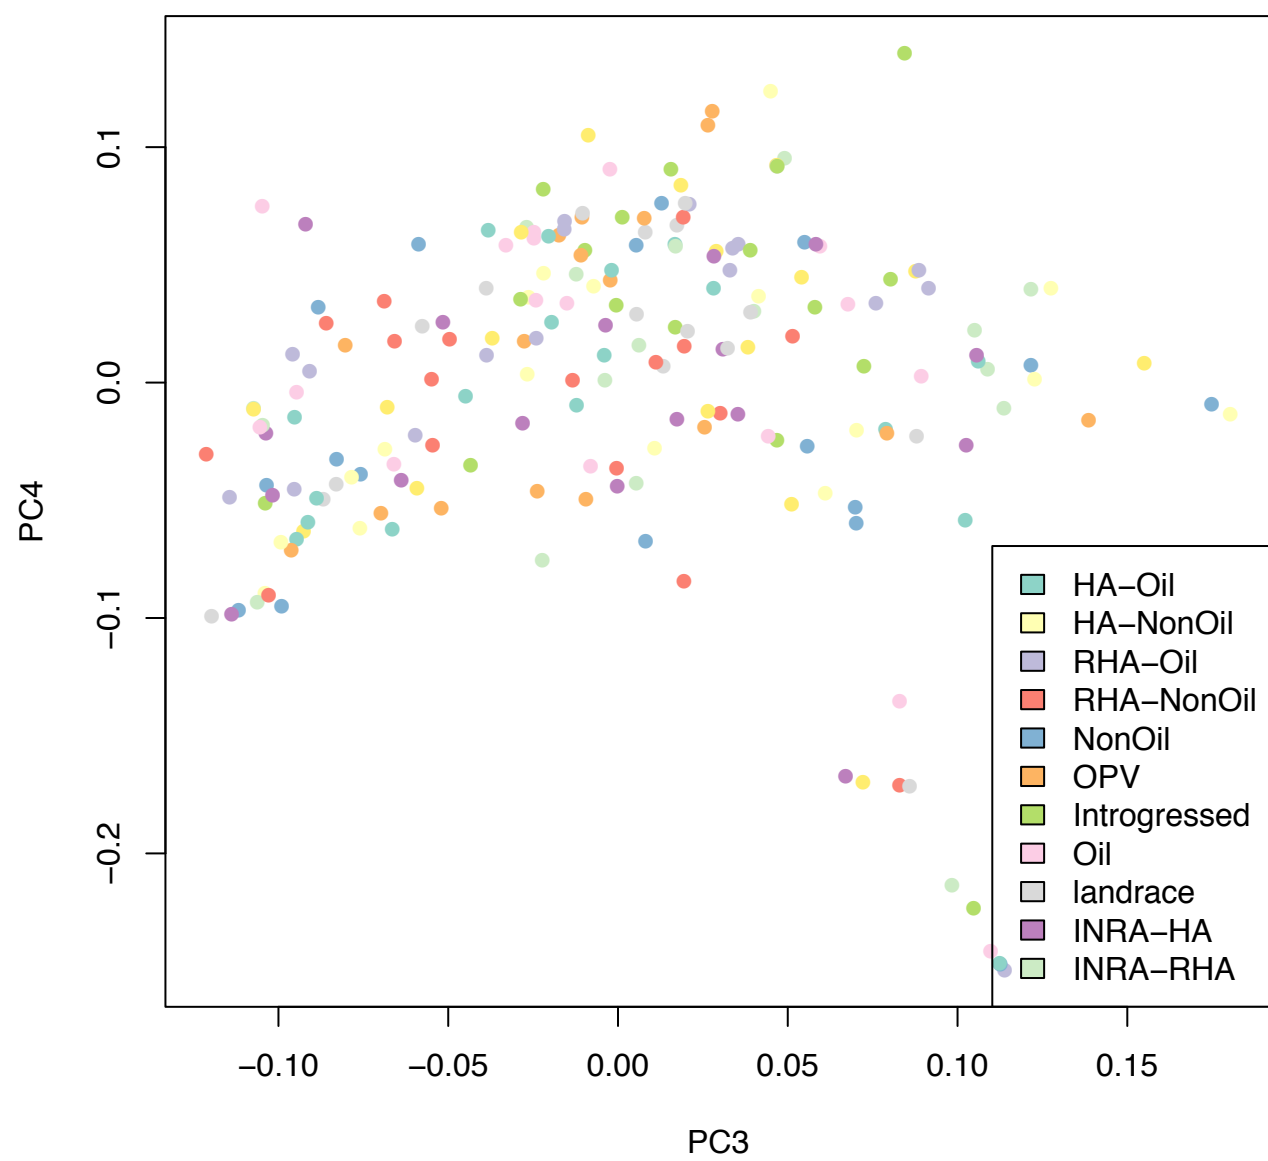

Supplement: pone.0204279.s001.pdf [file pone.0204279.s001.pdf]
