# Supplementary material for: Multiple genomic regions influence root morphology and seedling growth in cultivated sunflower (Helianthus annuus L.) under well-watered and water-limited conditions
Source: PubMed Central journal article supplement (PMC6147562; doi:10.1371/journal.pone.0204279), 2018-09-20

# LD of chrom 08 for Root.Biomass in Water-limited

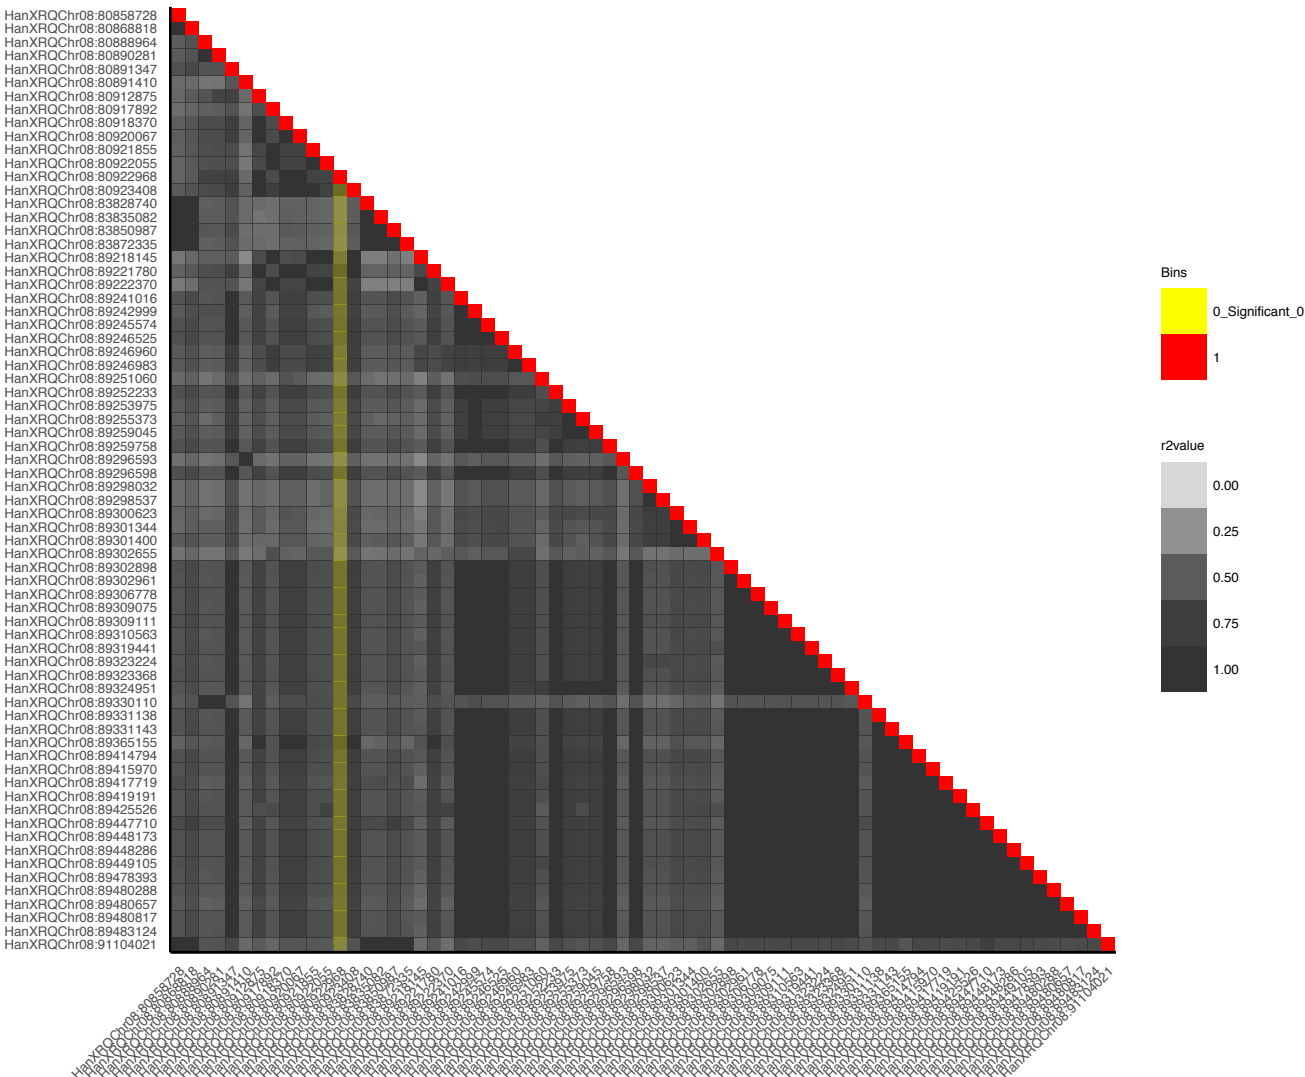

LD of chrom 10 for Biomass.Allocation in Well-watered

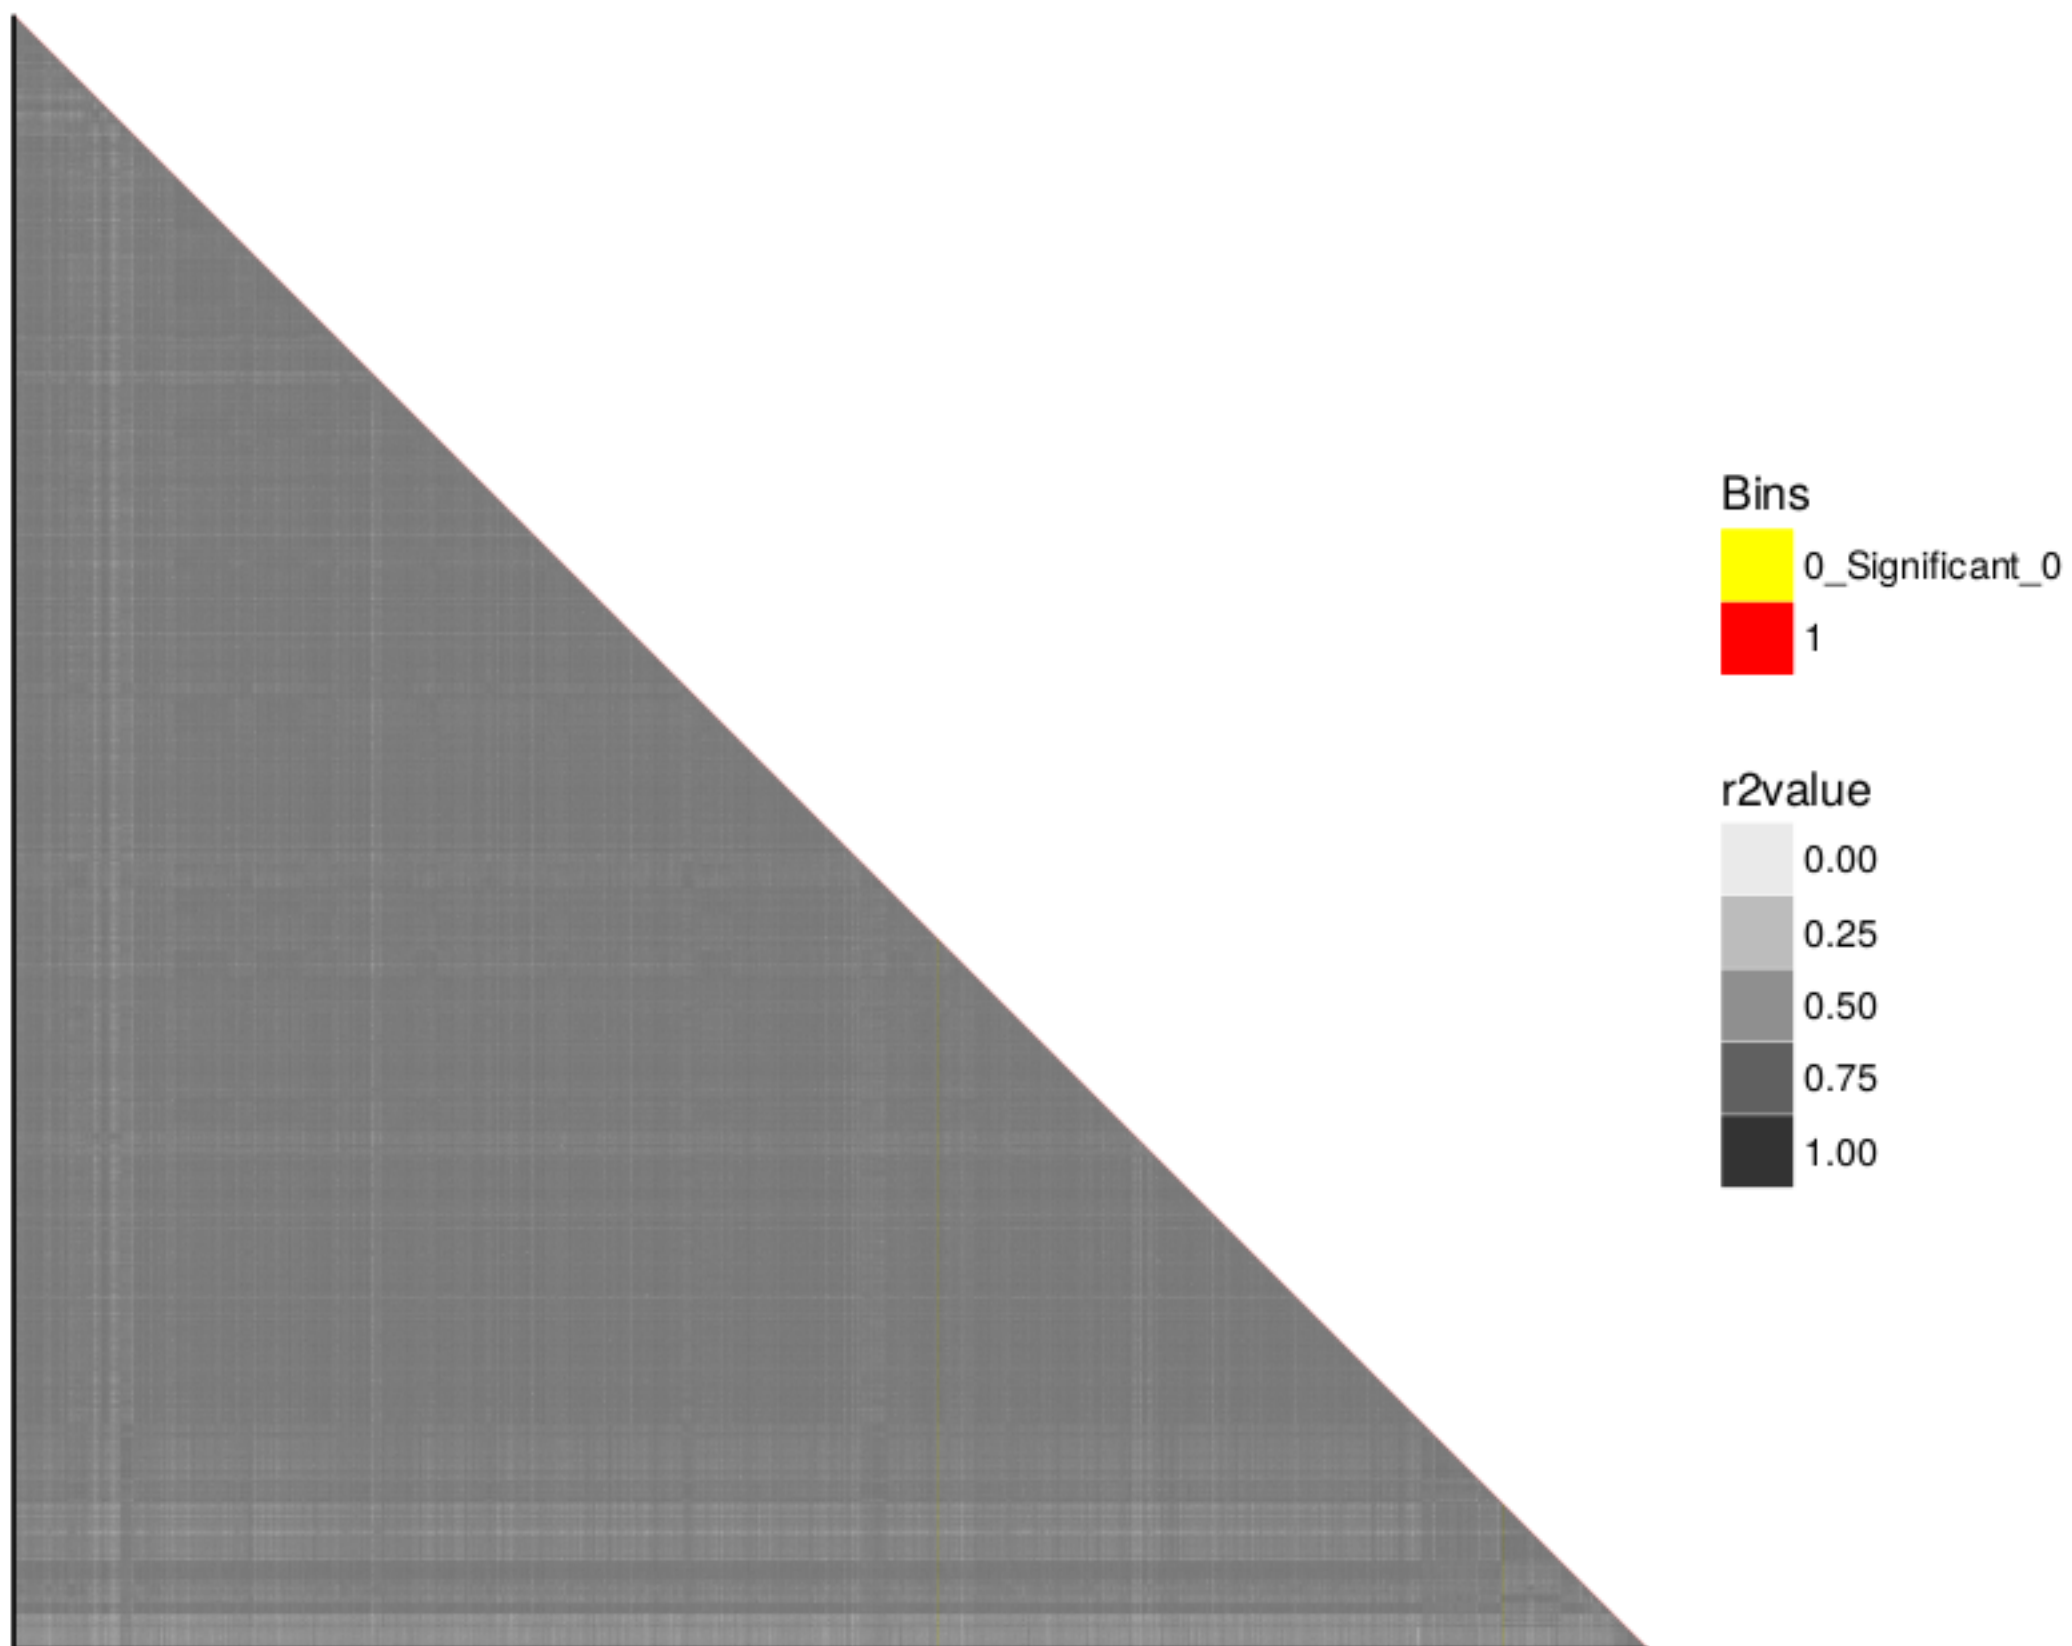

# LD of chrom 03 for Biomass.Allocation in Water-limited

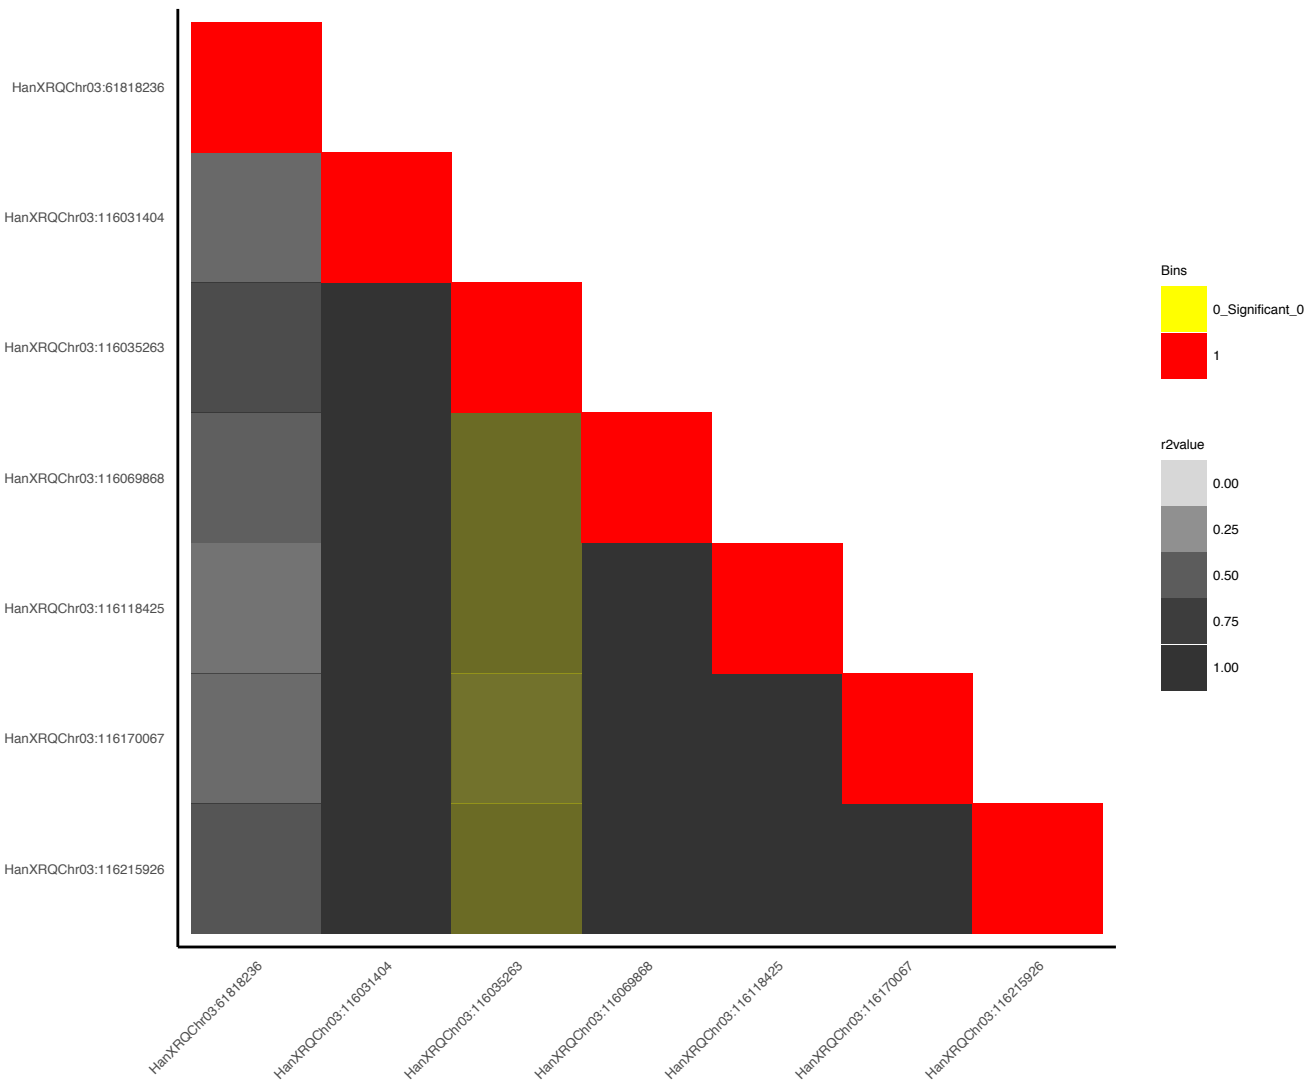

# LD of chrom 10 for Stem.Diameter in Water-limited

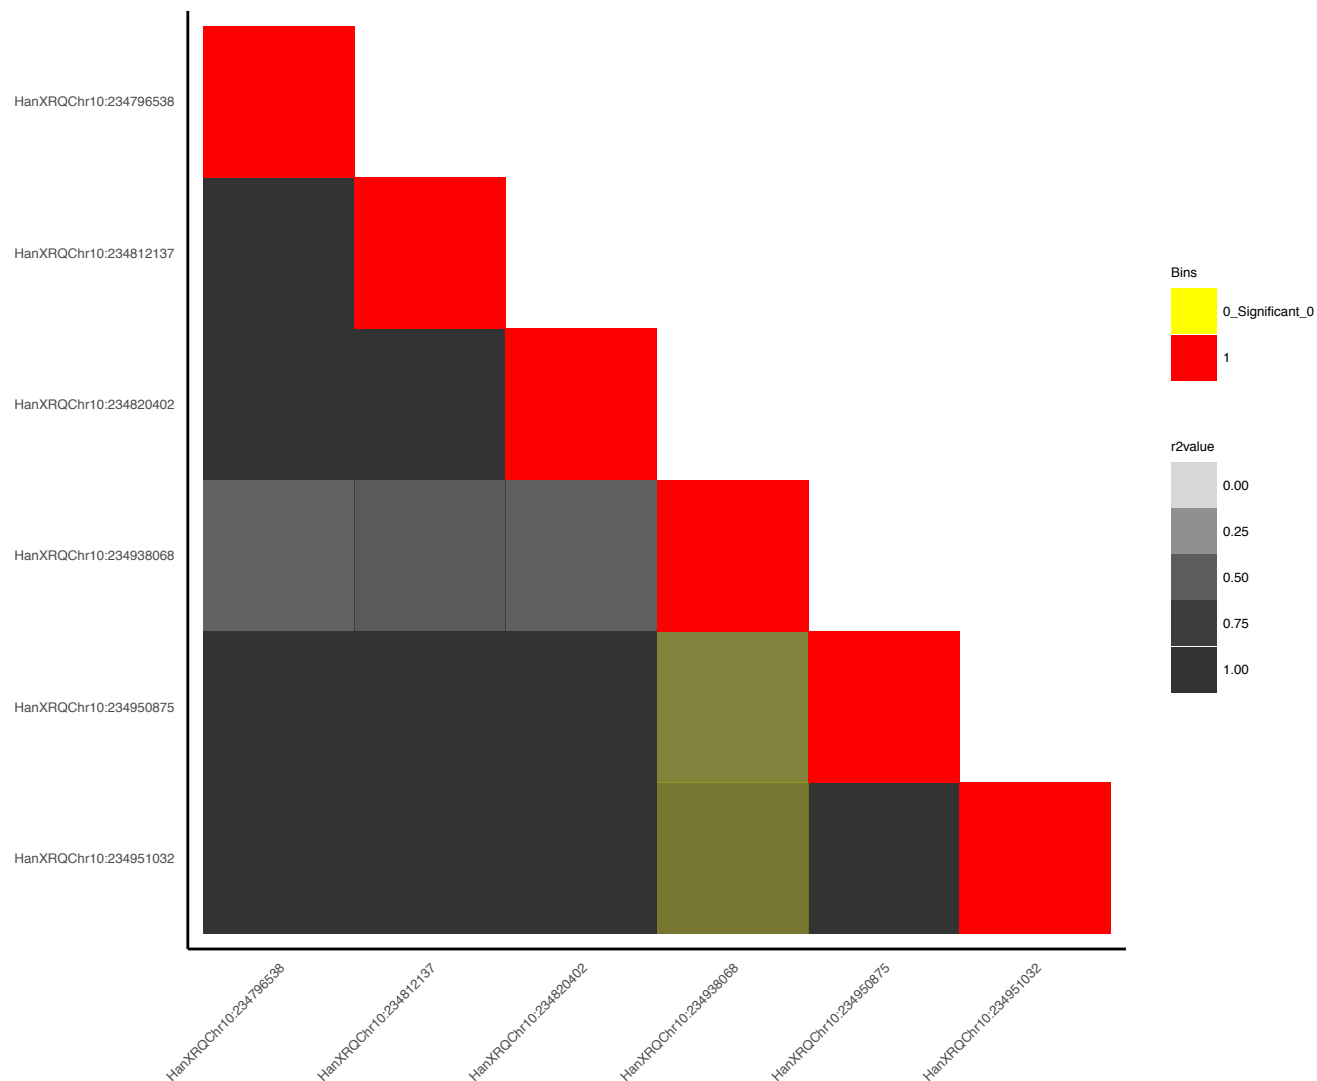

# LD of chrom 12 for Stem.Diameter in Well-watered

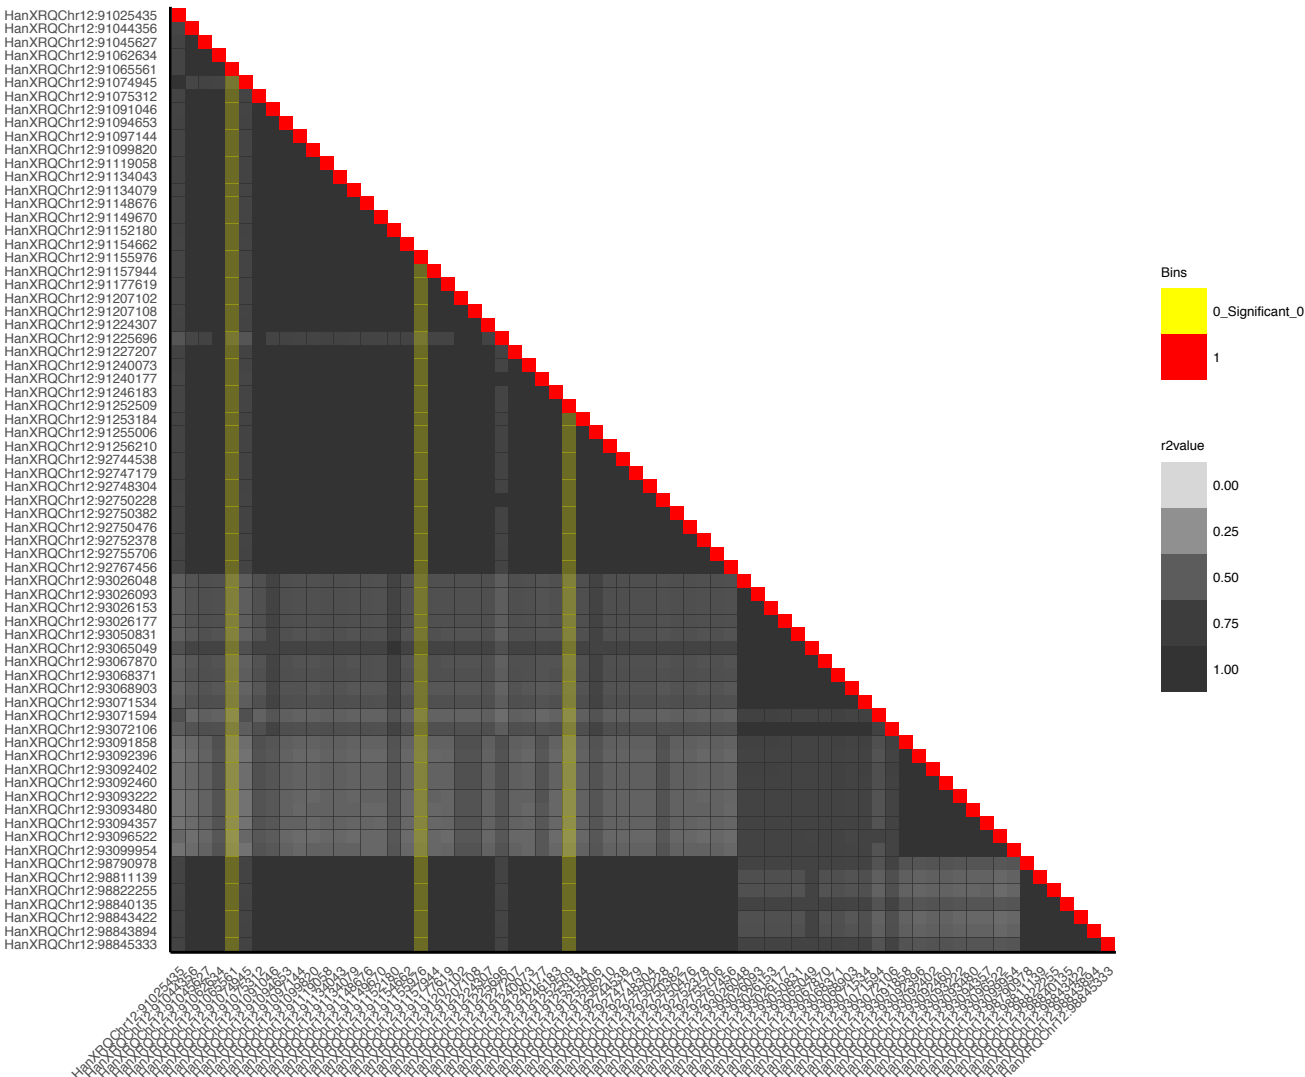

# LD of chrom 13 for Stem.Diameter in Water-limited

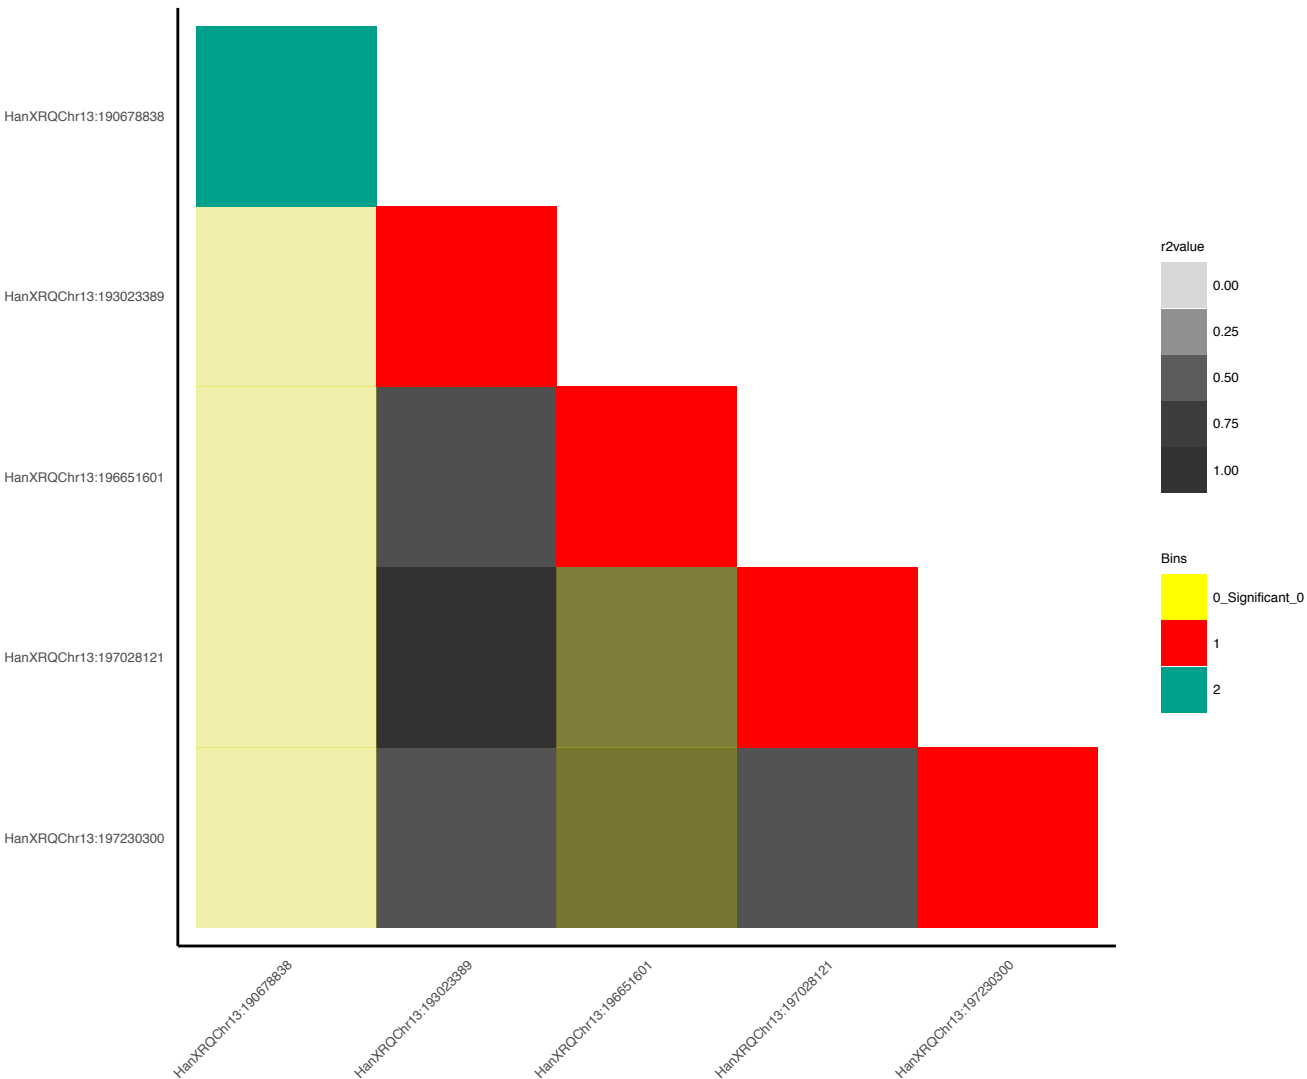

# LD of chrom 14 for Stem.Diameter in Water-limited

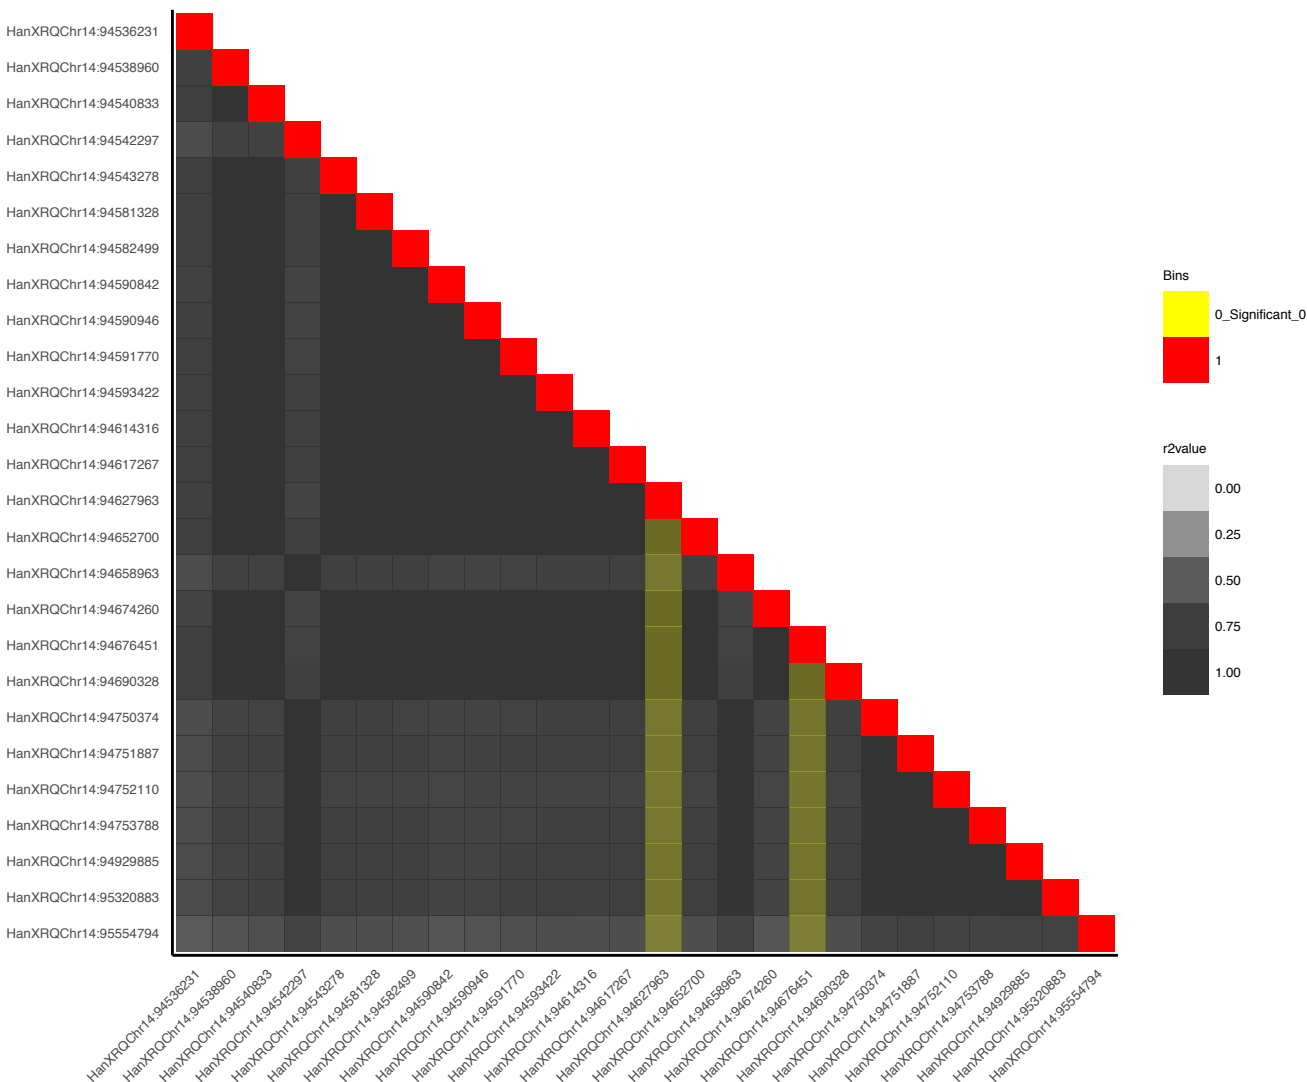

# LD of chrom 16 for Stem.Diameter in Water-limited

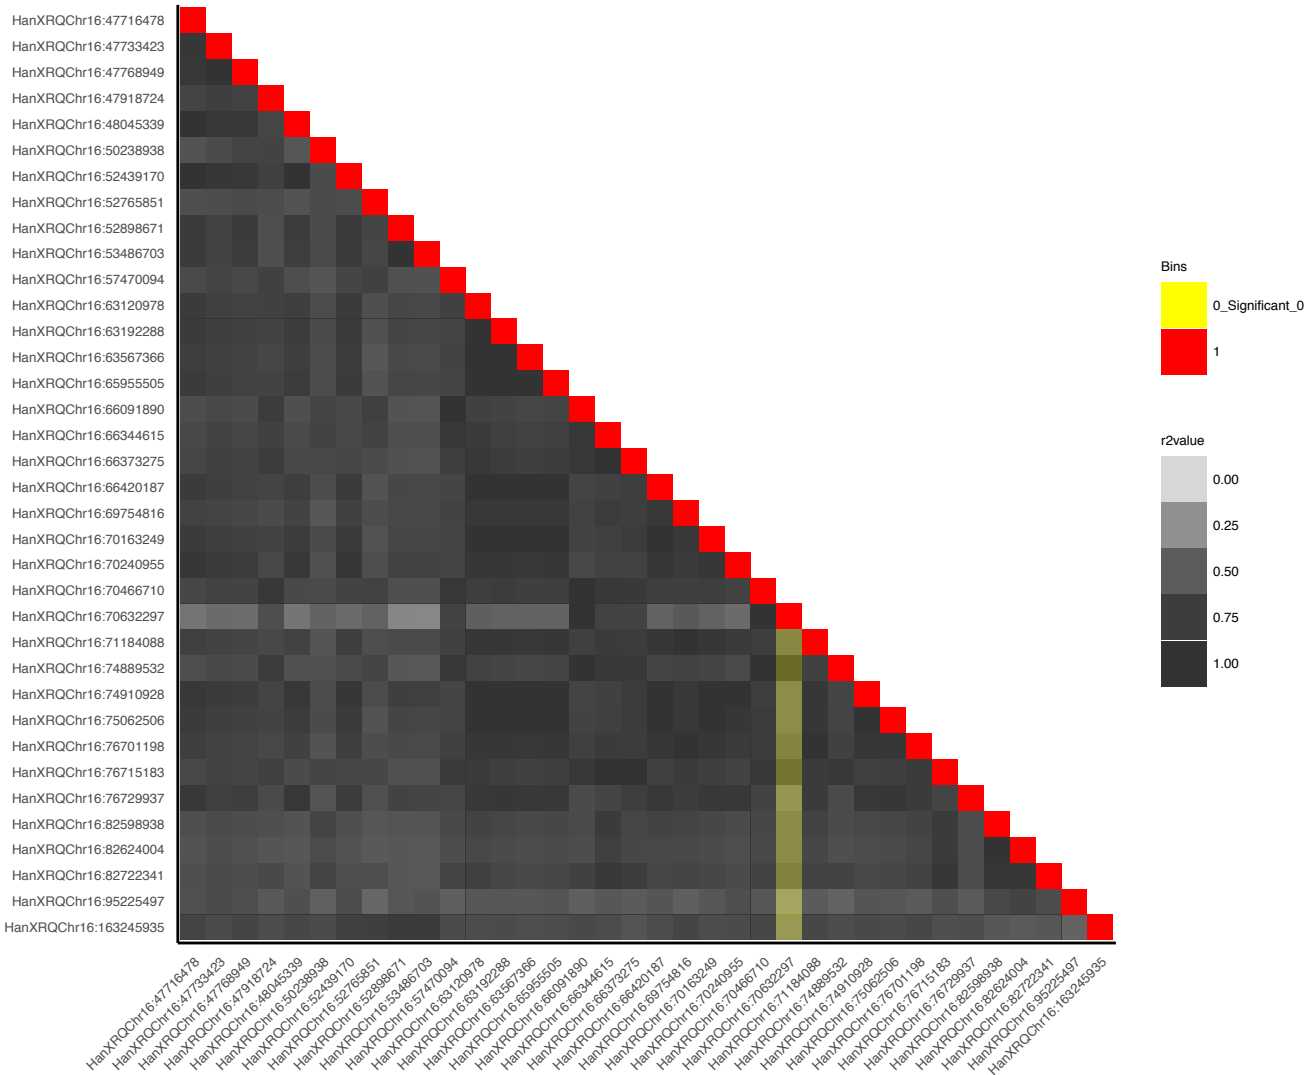



# LD of chrom 05 for Taproot.Length in Water-limited

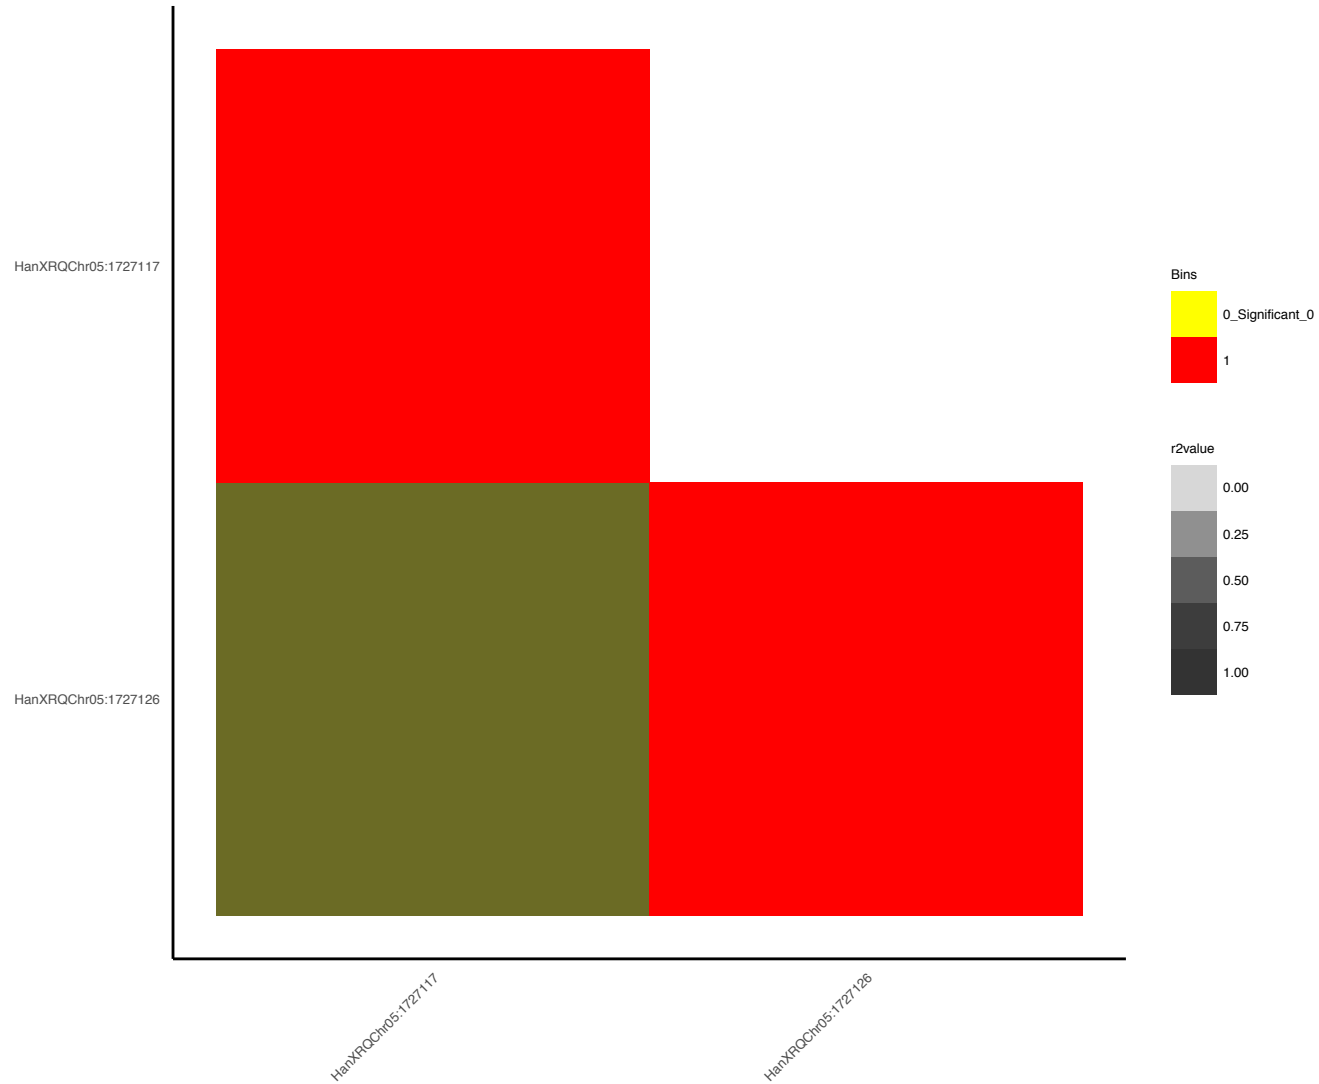

# LD of chrom 08 for TRL in Water-limited

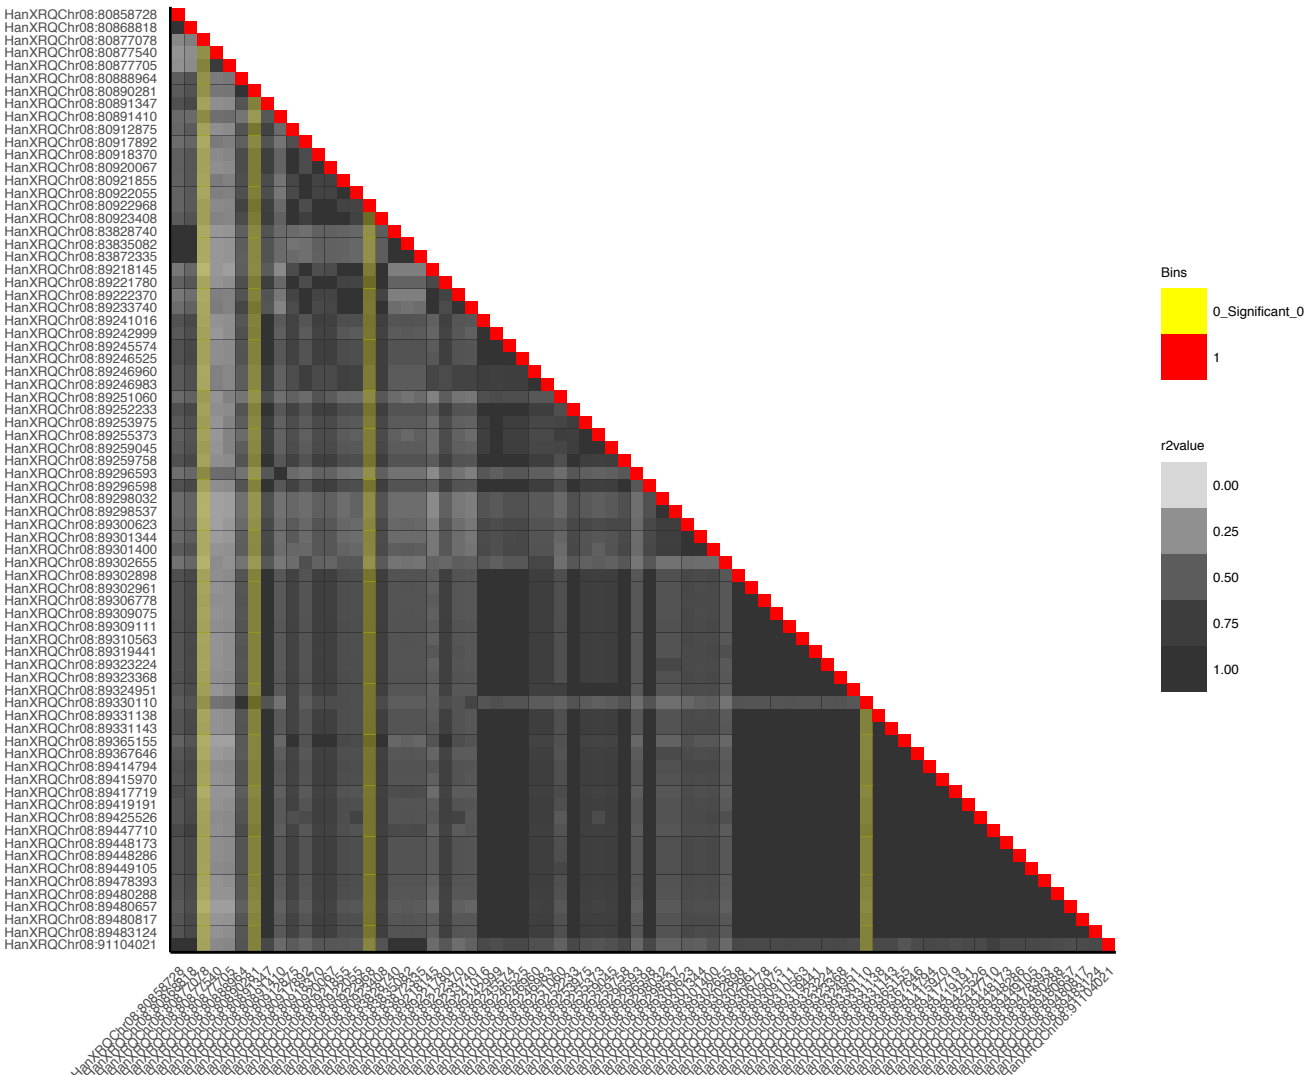

Supplement: pone.0204279.s004.pdf [file pone.0204279.s004.pdf]
